# Supplementary material for: Regulation of inflammation and protection against invasive pneumococcal infection by the long pentraxin PTX3
Source: eLife. 2023 May 24;12:e78601. doi: 10.7554/eLife.78601 (PMC10266767; doi:10.7554/eLife.78601)
Supplement: Figure 1—figure supplement 1—source data 1. [file elife-78601-fig1-figsupp1-data1.xlsx]

## Sheet: Panel A
Figure 1-figure supplement 1A - Local and systemic bacterial load kinetic from WT mice infected intranasally with 5x10^4 CFU/mice of S. pneumoniae serotype 3
time point (h)	CFU/lung
6	18000	32000	29000	15000	18000	59000	70000	25000	13000	29000
12	15000	17000	5000	14000	11000	8000	12000	6000	32000	38000	60000	28000	25000	2500	23000	1700
18	80000	620000	6000	60000	6000	29000	7000	12000	23000	28000	40000	3000	2300	14000	9000	2900
24	20000	110000	10000000	900000	3500000	900000	11000000	45000	1200000	60000	4900000	23000	9000000	9000000
36	4700000	19000000	1900000	45000000	7000000	24000000	22000000	8000000	17000000	7000000	7000000	1500000	4900000	14000000	3800000	5400000	4700000	2100000	7000000	7400000	4000000
48	29000000	110000000	4200000	2800000	58000000	36000000	30000	2800000	2400000	52000000	13000000	1900000	1100000	3300000	5400000	700000
time point (h)	CFU/spleen
6	5	5	5	5	5	5	5	5	5	5
12
18	10	5	5	5	5	5	5	5	5	5	5
24	90	10	5	10	5	1400	5	90	5	800	5	5	5
36	40	1100	600	170	8000	120	1400	90	130	120	150	200	190	700	250
48	170000	60000	2600	34000	69000	220000	130	40000	150000	23000	12000	40000	300	43000	80	10
