# Supplementary material for: Regulation of inflammation and protection against invasive pneumococcal infection by the long pentraxin PTX3
Source: eLife. 2023 May 24;12:e78601. doi: 10.7554/eLife.78601 (PMC10266767; doi:10.7554/eLife.78601)
Supplement: Figure 1—figure supplement 1—source data 2. [file elife-78601-fig1-figsupp1-data2.xlsx]

## Sheet: Panel B
Figure 1-figure supplement 1B - Survival of WT mice infected intranasally with 5x10^4 CFU/mice of S. pneumoniae serotype 3
Day	WT
3	1		0 = mice survived until day X post-infection
3	1		1 = mouse died at day X post-infection
3	1
3	1
3	1
4	1
4	1
4	1
4	1
4	1
3.5	1
3.5	1
3.5	1
3.75	1
3.75	1
4.5	1
4.5	1
4.5	1
3.5	1
3.5	1
3.5	1
3.5	1
3.5	1
3.5	1
3.5	1
3.75	1
3.75	1
4	1
4	1
4	1
4	1
4	1
4	1
