# Supplementary material for: Regulation of inflammation and protection against invasive pneumococcal infection by the long pentraxin PTX3
Source: eLife. 2023 May 24;12:e78601. doi: 10.7554/eLife.78601 (PMC10266767; doi:10.7554/eLife.78601)
Supplement: Figure 1—figure supplement 1—source data 3. [file elife-78601-fig1-figsupp1-data3.xlsx]

## Sheet: Panel C
Figure 1-figure supplement 1C - Organ disfuction associated protein levels in serum from uninfected and 36h post-infection intranasally with 5x10^4 CFU/mice of S. pneumoniae serotype 3
	Aspartate transaminase (U/L) level in serum
uninfected	128	87.5	88.5	98.5	111	92	78.5	80	90	89.5
36h post-infection	55	53.5	56	49.5	177.5
	Alanine transaminase (U/L) level in serum
uninfected	75	3.5	1.5	4		1	3.5	6	3	1.5
36h post-infection	17	17	40.5	28.5	5	40.5
	Creatine kinase (U/L) level in serum
uninfected	55	60	60	55	55
36h post-infection	225	140	205	110	150	75
	Creatinine (mg/dL) level in serum
uninfected	0	0	0	0	0	0	0	0	0	0
36h post-infection	2.55	4.8	0.05	4.75	3.45	6.35
