# Supplementary material for: Regulation of inflammation and protection against invasive pneumococcal infection by the long pentraxin PTX3
Source: eLife. 2023 May 24;12:e78601. doi: 10.7554/eLife.78601 (PMC10266767; doi:10.7554/eLife.78601)
Supplement: Figure 1—figure supplement 1—source data 4. [file elife-78601-fig1-figsupp1-data4.xlsx]

## Sheet: Panel D
Supplementary Figure 1D - Ptx3 mRNA expression kinetic in lung homogenates from WT mice intranasaly infected with 5x10^4 CFU/mice of S. pneumoniae serotype 3
time point (h)	Ptx3 relative mRNA levels (versus mock)
0	1.085	1.242	0.742
2	0.748	1.516	1.793
6	5.808	0.98	1.445
24	7.375	4.569	5.325
48	14.444	69.904	42.193
