# Supplementary material for: Regulation of inflammation and protection against invasive pneumococcal infection by the long pentraxin PTX3
Source: eLife. 2023 May 24;12:e78601. doi: 10.7554/eLife.78601 (PMC10266767; doi:10.7554/eLife.78601)
Supplement: Figure 1—figure supplement 1—source data 5. [file elife-78601-fig1-figsupp1-data5.xlsx]

## Sheet: Panel E
Supplementary Figure 1E - Ptx3 mRNA expression in various organs homogenates from WT infected intranasally with 5x10^4 CFU/mice of S. pneumoniae serotype 3
Organs	Ptx3 relative mRNA levels (versus mock)
lung	19.996	31.414	97.23	102.3	59.756
aorta	112.264	42.707	955.04	241.367	298.81
heart	210.462	111.154	215.431	325.93	133.752
brain	1.178	1.724	1.825	0.933	0.547
kidney	0.892	2.034	1.476	0.934
liver	0.376	1.832	1.134	0.313	3.683
