# Supplementary material for: Regulation of inflammation and protection against invasive pneumococcal infection by the long pentraxin PTX3
Source: eLife. 2023 May 24;12:e78601. doi: 10.7554/eLife.78601 (PMC10266767; doi:10.7554/eLife.78601)
Supplement: Figure 1—source data 1. [file elife-78601-fig1-data1.xlsx]

## Sheet: Panel B
Figure 1B- PTX3 staining quantification of immunohistochemical analysis of lung sections from S. pneumoniae serotype 3 (5x10^4 CFU/mice) infected miceB -
time point (h)	% PTX3+ area
0	1.63	2.09	2	2.87	3.14	2.55
6	2.99	7.12	5.66
12	10.91	8.183	9.46
24	25.29	14.88	12.075
