# Supplementary material for: Regulation of inflammation and protection against invasive pneumococcal infection by the long pentraxin PTX3
Source: eLife. 2023 May 24;12:e78601. doi: 10.7554/eLife.78601 (PMC10266767; doi:10.7554/eLife.78601)
Supplement: Figure 1—source data 2. [file elife-78601-fig1-data2.xlsx]

## Sheet: Panel C
Figure 1C - PTX3 protein levels expressed in the lung and serum of C57BL6 mice infected intranasally with 5x10^4 CFU/mice of S. pneumoniae serotype 3
time point (h)	PTX3 (ng/ml) in lung homogenates										PTX3 (ng/ml) in serum
0	3.26	4.6	3.95	4.72							49.217	41.482	50.201	34.12	40.42	22.05
2	1.85	3.42	3.13	3.1							63.939	38.835	28.854	36.498	32.02	18.66	34
6	3.18	4.14	4.48	3.68							41.397	67.746	34.625	51.458	44.58	57.03	21.43
12	4.96	4.5	4.03	6.28							53.184	48.011	41.538	44.94
18	6.24	4.34	11.13	3.27	6.79	3.82	3.64	2.62	4.34	5.28
24	6.06	18.98	10.13	7.03							48.792	55.98	37.303	46.603	16.92	30.65
36	116.28	260.13	217.6	205.32							179.09	182.81	247.91	119.35	271.7	67.21
48	180.91	136.66	101.93	23.29							450.99	225.47	188.46	387.61	615.87	132.66
