# Supplementary material for: Regulation of inflammation and protection against invasive pneumococcal infection by the long pentraxin PTX3
Source: eLife. 2023 May 24;12:e78601. doi: 10.7554/eLife.78601 (PMC10266767; doi:10.7554/eLife.78601)
Supplement: Figure 2—figure supplement 1—source data 1. [file elife-78601-fig2-figsupp1-data1.xlsx]

## Sheet: Panel A
Figure 2-figure supplement 1A - TNF level correlation with PTX3 level in pneumococcus infected lung
Pearson correlation test		DF	72
r	0.784963	n	74
t stat	10.7509	P value	6.33079e-17
	TNF (ng/ml)	PTX3 (ng/ml)
	1.86	17.808
	1.927	30.94
	1.911	33.888
	3.236	81.615
	2.522	3.5707
	3.54	30.69
	3.48	53.51
	4.44	59.08
	2.85	34.39
	2.63	28.38
	2.05	12.19
	3.84	31.85
	1.64	18.96
	2.98	36.41
	2.09	17.12
	2.49	32.86
	1.76	36.03
	3.07	40.71
	4.18	40.74
	1.57	16.18
	1.58	11.32
	2.92	21.8
	3.29	16.22
	2.84	29.33
	2.26	40.62
	2.6	33.04
	2.28	18.81
	3.32	49.63
	2.43	29.63
	2.18	35.79
	1.49	36.49
	3.85	71.95
	2.35	24.77
	3.23	34.29
	2.41	24.42
	3.53	56.41
	1.61	25.76
	3.77	67.6
	1.1	14.63
	3.19	122.43
	3.68	72.85
	3.19	57.45
	4.31	37.64
	3.88	33.61
	2	20.61
	3.06	28.3
	4.42	32.92
	2.65	13
	4.41	36.07
	3.29	33.56
	3.72	45.04
	1.03	4.6
	0.64	3.95
	0.63	4.72
	0.47	1.85
	0.69	3.42
	0.6	3.13
	0.6	3.1
	0.48	3.18
	0.87	4.14
	0.79	4.48
	0.63	3.68
	0.7	4.96
	0.56	4.5
	0.62	4.03
	0.73	6.28
	0.51	6.06
	4.12	18.98
	1.24	10.13
	1.27	7.03
	10.45	180.91
	12.99	136.66
	11.71	101.93
	8.55	23.29
Test for normal distribution D'Agostino & Pearson test
P value	<0,0001	<0,0001
K2	58.65	53.71
