# Supplementary material for: Regulation of inflammation and protection against invasive pneumococcal infection by the long pentraxin PTX3
Source: eLife. 2023 May 24;12:e78601. doi: 10.7554/eLife.78601 (PMC10266767; doi:10.7554/eLife.78601)
Supplement: Figure 2—figure supplement 1—source data 2. [file elife-78601-fig2-figsupp1-data2.xlsx]

## Sheet: Panel B
Figure 2-supplement figure 1B - IL-6 level correlation with PTX3 level in pneumococcus infected lung
Pearson correlation test		DF	47
r	0.63911	n	49
t stat	5.69682	P value	3.85966e-07
	IL-6 (ng/ml)	PTX3 (ng/ml)
	0.837	37.64
	0.458	33.61
	0.175	20.61
	0.304	28.3
	0.628	32.92
	0.403	13
	0.63	36.07
	0.59	33.56
	0.71	45.04
	0.33	49.63
	0.284	29.63
	0.367	35.79
	0.31	36.49
	0.379	71.95
	0.223	24.77
	0.442	34.29
	0.004	3.26
	0.009	4.6
	0.016	3.95
	0.018	4.72
	0.02	1.85
	0.023	3.42
	0.012	3.13
	0.021	3.1
	0.027	3.18
	0.027	4.14
	0.025	4.48
	0.02	3.68
	0.058	4.96
	0.047	4.5
	0.067	4.03
	0.111	6.28
	0.465	6.06
	1.515	18.98
	0.377	10.13
	0.392	7.03
	1.684	180.91
	2.218	136.66
	0.254	23.29
	0.62	4.03
	0.73	6.28
	0.51	6.06
	4.12	18.98
	1.24	10.13
	1.27	7.03
	10.45	180.91
	12.99	136.66
	11.71	101.93
	8.55	23.29
Test for normal distribution D'Agostino & Pearson test
P value	<0,0001	<0,0001
K2	50.21	37.53
