# Supplementary material for: Regulation of inflammation and protection against invasive pneumococcal infection by the long pentraxin PTX3
Source: eLife. 2023 May 24;12:e78601. doi: 10.7554/eLife.78601 (PMC10266767; doi:10.7554/eLife.78601)
Supplement: Figure 2—figure supplement 1—source data 3. [file elife-78601-fig2-figsupp1-data3.xlsx]

## Sheet: Panel C
Figure 2-figure supplement 1C - CXCL1 level correlation with PTX3 level in pneumococcus infected lung
Pearson correlation test		DF	27
r	0.127143	n	29
t stat	0.666062	P value	0.255511
	CXCL1 (ng/ml)	PTX3 (ng/ml)
	7.77	30.69
	6.59	53.51
	5.92	59.08
	5.63	34.39
	6.23	28.38
	4.89	12.19
	8.4	31.85
	6.11	18.96
	4.74	36.41
	5.53	17.12
	7.64	32.86
	6.61	36.03
	8.24	40.71
	5.79	40.74
	8.34	16.18
	5.35	11.32
	7.47	21.8
	8.4	16.22
	6.82	29.33
	11.87	40.62
	7.31	33.04
	7.9	18.81
	11.64	49.63
	8.67	29.63
	9.28	35.79
	11.64	36.49
	5.88	71.95
	7.55	24.77
	11.69	34.29
Test for normal distribution D'Agostino & Pearson test
P value	0.1367	0.0678
K2	3.98	5.382
