# Supplementary material for: Regulation of inflammation and protection against invasive pneumococcal infection by the long pentraxin PTX3
Source: eLife. 2023 May 24;12:e78601. doi: 10.7554/eLife.78601 (PMC10266767; doi:10.7554/eLife.78601)
Supplement: Figure 2—source data 1. [file elife-78601-fig2-data1.xlsx]

## Sheet: Panel A
IL-1b protein levels expressed in the lung of C57BL6 mice infected intranasally with 5x10^4 CFU/mice of S. pneumoniae serotype 3
time point (h)	IL-1b (ng/ml) in lung homogenates
0	0.033	0.037	0.033	0.041
2	0.034	0.039	0.044	0.079
6	0.12	0.095	0.144	0.082
12	0.185	0.23	0.234	0.357
18	0.58	1.64	2.75
24	0.835	10.89	1.34	1.91
36	8.39	18.29	18.33	17.04
48	8.32	12.74	16.5	1.26
