# Supplementary material for: Regulation of inflammation and protection against invasive pneumococcal infection by the long pentraxin PTX3
Source: eLife. 2023 May 24;12:e78601. doi: 10.7554/eLife.78601 (PMC10266767; doi:10.7554/eLife.78601)
Supplement: Figure 2—source data 2. [file elife-78601-fig2-data2.xlsx]

## Sheet: Panel B
correlation IL-1b and PTX3 expressions in the lung of C57BL6 mice infected intranasally with 5x10^4 CFU/mice of S. pneumoniae serotype 3
Pearson correlation test		DF	58
r	0.725167	n	60
t stat	8.0205	P value	2.82939e-11
	IL-1b (ng/ml)	PTX3 (ng/ml)
	5.75	17.32
	7.45	47.17
	11.18	39.84
	5.8	23.24
	6.34	37.06
	10.07	60.79
	7.8	40.61
	8.76	30.69
	9.73	53.51
	10.63	59.08
	7.72	34.39
	6.22	28.38
	11.23	31.85
	5.99	18.96
	5.04	36.41
	6.12	17.12
	7.94	32.86
	6.32	36.03
	8.03	40.71
	6.55	40.74
	6.44	16.18
	2.3	11.32
	7.05	21.8
	5.41	16.22
	5.55	29.33
	7.41	40.62
	7.79	33.04
	5.7	18.81
	9.21	37.64
	9.54	33.61
	1.36	20.61
	5.2	28.3
	8.05	32.92
	3.94	13
	9.41	36.07
	7.02	33.56
	10.57	45.04
	5.86	17.81
	7.57	30.94
	6.48	81.62
	3.91	35.71
	11.68	49.63
	6.83	29.63
	7.11	35.79
	6.58	36.49
	7.85	71.95
	4.57	24.77
	3	24.42
	8.49	56.41
	11.01	67.6
	7.34	72.85
	8.69	57.45
	1.64	6.24
	2.75	11.13
	1	6.79
	0.67	3.82
	0.57	3.64
	1.17	2.62
	1.45	4.34
	1.43	5.28
