# Supplementary material for: Regulation of inflammation and protection against invasive pneumococcal infection by the long pentraxin PTX3
Source: eLife. 2023 May 24;12:e78601. doi: 10.7554/eLife.78601 (PMC10266767; doi:10.7554/eLife.78601)
Supplement: Figure 2—source data 3. [file elife-78601-fig2-data3.xlsx]

## Sheet: Panel C
PTX3 protein levels expressed in the lung of Il1r-/-, MyD88-/- or WT mice infected intranasally with 5x10^4 CFU/mice of S. pneumoniae serotype 3
	WT	Il1r-/-	Myd88-/-
PTX3 (ng/ml)	124.684	22.894	7.727
	77.014	28.914	12.367
	95.552	17.03	4.39
	31.439	11.259	3.774
	70.815	23.78	3.54
	61.858	11.384	4.628
	220.611		5.137
			5.047
			4.807
