# Supplementary material for: Regulation of inflammation and protection against invasive pneumococcal infection by the long pentraxin PTX3
Source: eLife. 2023 May 24;12:e78601. doi: 10.7554/eLife.78601 (PMC10266767; doi:10.7554/eLife.78601)
Supplement: Figure 2—source data 4. [file elife-78601-fig2-data4.xlsx]

## Sheet: Panel D
Figure 2D - PTX3 protein levels expressed in the serum of Il1r-/-, Myd88-/- and WT mice infected intranasally with 5x10^4 CFU/mice of S. pneumoniae serotype 3
	WT	Il1r-/-	Myd88-/-
PTX3 (ng/ml)	63.825	15.9	10.63
	62.825	16.67	10.42
	47.358	16.24	29.38
	28.993	16.43	13.28
	60.936	16.782	20.96
	36.474	20.93	9.48
	42.151		10.87
			10.19
			20.91
