# Supplementary material for: Regulation of inflammation and protection against invasive pneumococcal infection by the long pentraxin PTX3
Source: eLife. 2023 May 24;12:e78601. doi: 10.7554/eLife.78601 (PMC10266767; doi:10.7554/eLife.78601)
Supplement: Figure 3—figure supplement 1—source data 1. [file elife-78601-fig3-figsupp1-data1.xlsx]

## Sheet: Panel A
Figure 3-figure supplement 1A - PTX3 released by S. pneumoniae or PMA stimulated human purified PMNs
	control (medium)	S. pneumoniae	PMA
PTX3 (ng/ml)	3.128	14.672	9.264
	3.739	13.88	7.896
	3.214	12.433	8.112
	2.822	9.237
	3.773	8.075
	0.91	11.925
	0.844	10.776
	0.895	9.62
	0.77	8.645
	0.861	7.542
	0.859	10.349
