# Supplementary material for: Regulation of inflammation and protection against invasive pneumococcal infection by the long pentraxin PTX3
Source: eLife. 2023 May 24;12:e78601. doi: 10.7554/eLife.78601 (PMC10266767; doi:10.7554/eLife.78601)
Supplement: Figure 3—figure supplement 1—source data 2. [file elife-78601-fig3-figsupp1-data2.xlsx]

## Sheet: Panel B
Figure 3-figure supplement 1B - PTX3 and MPO production in lungs of WT and Csf3r-/- mice infected intranasaly with 5x10^4 CFU/mice of S. pneumoniae serotype 3
	MPO		PTX3
	WT	Csf3r-/-	WT	Csf3r-/-
Protein (ng/ml)	1670.81	550.34	15.88	14.99
	2451.68	740.56	17.03	12.78
	1255.61	231.84	8.41	2.66
	2240.05	360.54	14.62	6.65
	1697.71	325.31	35.57	15.94
	524.22	670.35	4.33	40.53
	485.46	950.01	2.99	109.43
	1630.14	376.58	23.93	24.94
	1877.98	187.27	43.6	12.31
	547.36	703.2	16.07	49.98
	1700.24	165.11	71.77	4.95
	1674.62	138.76	27.32	5.15
	2549.82	1335.27	76.7	143.04
	1638.68	559.17	39.13	16.51
	2018.38	364.19	70.58	17.92
	753.3	1646.31	19.19	147.42
	764.16	344.98	18.3	13.64
	1641.87	222.78	89.23	7.31
