# Supplementary material for: Regulation of inflammation and protection against invasive pneumococcal infection by the long pentraxin PTX3
Source: eLife. 2023 May 24;12:e78601. doi: 10.7554/eLife.78601 (PMC10266767; doi:10.7554/eLife.78601)
Supplement: Figure 3—figure supplement 1—source data 3. [file elife-78601-fig3-figsupp1-data3.xlsx]

## Sheet: Panel C
Figure 3-figure supplement 1C - PTX3 released by S. pneumoniae, IL-1β or LPS stimulated murine and human endothelial cells
	murine endothelial cells (1G11)				human endothelial cells (HUVEC)
	control (medium)	S. pneumoniae	IL-1β	LPS	control (medium)	S. pneumoniae	IL-1β	LPS
Ptx3 relative mRNA levels (versus control)	0.906	5.031	9.085	4.402	0.937	1.966	10.544	2.728
	1.143	4.827	27.192	4.866	1.067	3.588	5.882	4.796
	0.966	2.913	18.011	1.575	0.849	2.293	17.868	7.671
					1.178	5.2	4.134	7.661
						3.523	6.449
							11.747
