# Supplementary material for: Regulation of inflammation and protection against invasive pneumococcal infection by the long pentraxin PTX3
Source: eLife. 2023 May 24;12:e78601. doi: 10.7554/eLife.78601 (PMC10266767; doi:10.7554/eLife.78601)
Supplement: Figure 3—source data 1. [file elife-78601-fig3-data1.xlsx]

## Sheet: Panel A
Figure 3A - PTX3 protein levels in expressed in the lung of Ptx3-/- and WT chimeras infected intranasally with 5x10^4 CFU/mice of S. pneumoniae serotype 3
	WT --> WT	KO --> WT	WT --> KO	KO --> KO
PTX3 (ng/ml)	90.5	176.87	2	2
	147.46	233.42	2.05	2
	125.53	136.91	2	2
	186.13	26.77	2	2
	137.77	54.57	2	2
	44.45	307.45	2.29	2
	250.5	36.16	2.31	2
	128.45	222.06	2	2
	85.73	150.68	2	2
	68.5	116.86	2	2
	180.65	307.8	2	2
	366.42	208.9	2.14	2
		84.09	2
			2
