# Supplementary material for: Regulation of inflammation and protection against invasive pneumococcal infection by the long pentraxin PTX3
Source: eLife. 2023 May 24;12:e78601. doi: 10.7554/eLife.78601 (PMC10266767; doi:10.7554/eLife.78601)
Supplement: Figure 3—source data 2. [file elife-78601-fig3-data2.xlsx]

## Sheet: Panel B
Figure 3B - PTX3 protein levels expressed in serum Ptx3-/- and WT chimeras infected intranasally with 5x10^4 CFU/mice of S. pneumoniae serotype 3
	WT --> WT	KO --> WT	WT --> KO	KO --> KO
PTX3 (ng/ml)	195.39	337.39	0.28	0.25
	182.09	90.54	0.32	0.25
	236.32	253.53	0.35	0.25
	139.77	166.73	0.25	0.25
	297.53	141.23	0.67	0.25
	77.72	215.95	0.25	0.25
