# Supplementary material for: Regulation of inflammation and protection against invasive pneumococcal infection by the long pentraxin PTX3
Source: eLife. 2023 May 24;12:e78601. doi: 10.7554/eLife.78601 (PMC10266767; doi:10.7554/eLife.78601)
Supplement: Figure 3—source data 3. [file elife-78601-fig3-data3.xlsx]

## Sheet: Panel C
Figure 3C - PTX3 protein levels expressed in the lung of mice Ptx3 conditionnaly deficient in endothelial cells infected intranasally with 5x10^4 CFU/mice of S. pneumoniae serotype 3
	Ptx3Lox/LoxCdh5+/+	Ptx3Lox/LoxCdh5Cre/+
PTX3 (ng/ml)	124.897	38.352
	105.937	50.259
	104.203	41.549
	157.391	31.865
	288.738	87.647
	50.453	48.541
	106.107	52.688
	42.482	35.845
	66.335	38.762
	31.388	58.847
	103.618
	57.942
	90.217
