# Supplementary material for: Regulation of inflammation and protection against invasive pneumococcal infection by the long pentraxin PTX3
Source: eLife. 2023 May 24;12:e78601. doi: 10.7554/eLife.78601 (PMC10266767; doi:10.7554/eLife.78601)
Supplement: Figure 3—source data 4. [file elife-78601-fig3-data4.xlsx]

## Sheet: Panel D
Figure 3D - PTX3 protein levels expressed in the serum of mice Ptx3 conditionnaly deficient in endothelial cells infected intranasally with 5x10^4 CFU/mice of S. pneumoniae serotype 3
	Ptx3Lox/LoxCdh5+/+	Ptx3Lox/LoxCdh5Cre/+
PTX3 (ng/ml)	157.59	43.356
	70.386	45.797
	94.394	50.394
	94.692	53.57
	160.222	59.266
	55.03	54.102
	62.053	45.034
	49.355	33.927
	61.441	22.46
	45.169	26.878
	85.18
	50.666
	85.099
