# Supplementary material for: Regulation of inflammation and protection against invasive pneumococcal infection by the long pentraxin PTX3
Source: eLife. 2023 May 24;12:e78601. doi: 10.7554/eLife.78601 (PMC10266767; doi:10.7554/eLife.78601)
Supplement: Figure 4—figure supplement 1—source data 1. [file elife-78601-fig4-figsupp1-data1.xlsx]

## Sheet: Panel A
Figure 4-figure supplement 1A - Local bacterial load in lung homogenates from WT and Ptx3-/- mice 18h post-infection with S. pneumoniae serotype 3
	WT	Ptx3-/-
CFU/lung	1200	600
	9000	7000
	23000	1000
	9000	14000
	12000	60000
	8000	7000
	19000	600
	10000	10000
	4000	9000
	2300	80000
	200000	32000
	8000	18000
	11000	340000
	9000	22000
	11000	130000
	1050000	41000
	44000	150000
	40000	12000
	29000	8000
	19000
