# Supplementary material for: Regulation of inflammation and protection against invasive pneumococcal infection by the long pentraxin PTX3
Source: eLife. 2023 May 24;12:e78601. doi: 10.7554/eLife.78601 (PMC10266767; doi:10.7554/eLife.78601)
Supplement: Figure 4—figure supplement 1—source data 2. [file elife-78601-fig4-figsupp1-data2.xlsx]

## Sheet: Panel B
Figure 4-figure supplement 1B - PTX3 expression locally (lung homogenates) and systemically (serum) induced by S. pneumoniae serotype 1 intranasal infection
	lung
time post-infection	0h	18h	24h
PTX3 (ng/ml)	8.16	36.09	37.74
	10.12	58.25	84.72
	7.9	52.4	119.84
	7.98	11.25	64.51
	8.79		38.67
	serum
time post-infection	0h	18h	24h
PTX3 (ng/ml)	31.3	35.27	454.73
	38.73	61.56	66.82
	26.65	38.85	573.6
	25.53	30.37	44.18
	23.57
