# Supplementary material for: Regulation of inflammation and protection against invasive pneumococcal infection by the long pentraxin PTX3
Source: eLife. 2023 May 24;12:e78601. doi: 10.7554/eLife.78601 (PMC10266767; doi:10.7554/eLife.78601)
Supplement: Figure 4—figure supplement 1—source data 3. [file elife-78601-fig4-figsupp1-data3.xlsx]

## Sheet: Panel C
Figure 4-figure supplement 1C - correlation between IL-1β and PTX3 expressions in the lung infected with S. pneumoniae serotype 1
	IL-1β (ng/ml)	PTX3 (ng/ml)
	1.32	36.09
	2.57	52.4
	0.24	11.25
	1.24	37.74
	1.56	84.72
	2.8	119.84
	1.51	64.51
	0.72	38.67
