# Supplementary material for: Regulation of inflammation and protection against invasive pneumococcal infection by the long pentraxin PTX3
Source: eLife. 2023 May 24;12:e78601. doi: 10.7554/eLife.78601 (PMC10266767; doi:10.7554/eLife.78601)
Supplement: Figure 4—figure supplement 1—source data 4. [file elife-78601-fig4-figsupp1-data4.xlsx]

## Sheet: Panel D
Supplementary Figure 3D - Local bacterial load in lung homogenates from WT and Ptx3-/- mice 24h post-infection with S. pneumoniae serotype 1
	WT	Ptx3-/-
CFU/lung	78300	20000000
	33300	417000
	182000	583000
	33300	7000000
	30000	80000
	2170000	110000
	56700	58300
	140000	267000
	4330	250000
	8670	367000
	5670	167000
	933000	350000
