# Supplementary material for: Regulation of inflammation and protection against invasive pneumococcal infection by the long pentraxin PTX3
Source: eLife. 2023 May 24;12:e78601. doi: 10.7554/eLife.78601 (PMC10266767; doi:10.7554/eLife.78601)
Supplement: Figure 4—figure supplement 1—source data 5. [file elife-78601-fig4-figsupp1-data5.xlsx]

## Sheet: Panel E
Figure 4-figure supplement 1E - Systemic bacterial load in spleen homogenates from WT and Ptx3-/- mice 24h post-infection with S. pneumoniae serotype 1
	WT	Ptx3-/-
CFU/spleen	18300	750000
	217	167000
	2500	30000
	5170	683000
	283	8170
	100000	2500
	183	4330
	833	60000
	50	26700
	16.7	123000
	100	16700
	21700	300000
