# Supplementary material for: Regulation of inflammation and protection against invasive pneumococcal infection by the long pentraxin PTX3
Source: eLife. 2023 May 24;12:e78601. doi: 10.7554/eLife.78601 (PMC10266767; doi:10.7554/eLife.78601)
Supplement: Figure 4—source data 1. [file elife-78601-fig4-data1.xlsx]

## Sheet: Panel A
Figure 4A - CFUs in lungs homogenates from Ptx3-/- mice infected intranasally with 5x10^4 CFU/mice of S. pneumoniae serotype 3 (36h post-infection)
	WT	Ptx3-/-
CFU/lung	4700000	34000000
	19000000	15000000
	1900000	7000000
	45000000	16000000
	7000000	21000000
	24000000	29000000
	22000000	10000000
	8000000	49000000
	17000000	18000000
	7000000	14000000
	7000000	37000000
	4900000	19000000
	14000000	26000000
	3800000	3700000
	5400000	32000000
	4700000	24000000
	2100000
	1500000
	7000000
	7400000
	4000000
