# Supplementary material for: Regulation of inflammation and protection against invasive pneumococcal infection by the long pentraxin PTX3
Source: eLife. 2023 May 24;12:e78601. doi: 10.7554/eLife.78601 (PMC10266767; doi:10.7554/eLife.78601)
Supplement: Figure 4—source data 2. [file elife-78601-fig4-data2.xlsx]

## Sheet: Panel B
Figure 4B - CFUs in spleen homogenates from Ptx3-/- mice infected intranasally with 5x10^4 CFU/mice of S. pneumoniae serotype 3 (36h post-infection)
	WT	Ptx3-/-
CFU/spleen	40	30
	1100	600
	600	300
	170	2500
	8000	110000
	120	5000
	1400	5000
	90	70
	130	1400
	120	1200
	150	50000
	200	90
	190	1600
	700	2500
	250	27000
	10	3000
	5
