# Supplementary material for: Regulation of inflammation and protection against invasive pneumococcal infection by the long pentraxin PTX3
Source: eLife. 2023 May 24;12:e78601. doi: 10.7554/eLife.78601 (PMC10266767; doi:10.7554/eLife.78601)
Supplement: Figure 4—source data 3. [file elife-78601-fig4-data3.xlsx]

## Sheet: Panel C
Figure 4C - Survival of Ptx3-/- mice infected intranasally with 5x10^4 CFU/mice of S. pneumoniae serotype 3
Day	WT	Ptx3-/-
3.75	1
3.75	1			0 = mice survived until day X post-infection
4.5	1			1 = mouse died at day X post-infection
8	0
8	0
8	0
8	0
3		1
3		1
3		1
3.5		1
3.5		1
4		1
8		0
3.75	1
6	1
8	0
8	0
8	0
8	0
8	0
8	0
8	0
8	0
3		1
3.25		1
3.25		1
3.5		1
3.5		1
3.75		1
4		1
4.5		1
5.5		1
8		0
8		0
