# Supplementary material for: Regulation of inflammation and protection against invasive pneumococcal infection by the long pentraxin PTX3
Source: eLife. 2023 May 24;12:e78601. doi: 10.7554/eLife.78601 (PMC10266767; doi:10.7554/eLife.78601)
Supplement: Figure 4—source data 4. [file elife-78601-fig4-data4.xlsx]

## Sheet: Panel D
Figure 4D - CFUs in lungs homogenates from WT, Ptx3-/- and Ptx3-/- reconstituted with recombinant PTX3 intraperitoneally (10μg/100μl) before the infection and 24h post-infection with 5x10^4 CFU/mice of S. pneumoniae serotype 3 (36h post-infection)
	WT	Ptx3-/-	Ptx3-/- + PTX3
CFU/lung	3700000	8000000	260000
	3200000	3000000	3700000
	14000000	7000000	2800000
	4300000	14000000	5900000
	3600000	8000000	4800000
	6900000	10000000	9000000
	4400000	18000000	580000
	7200000	6000000	3200000
	5700000	5400000	2700000
	2600000	7100000	9000000
	7000000	8500000	5100000
	5100000	10000000	18000000
	6200000	8000000	5400000
	5200000	5900000	4000000
	11000000	10700000	900000
	9000000	9700000	1200000
	2900000	10100000	13000000
	11300000	8200000	5200000
			4700000
			6700000
			2300000
			12700000
			4700000
