# Supplementary material for: Regulation of inflammation and protection against invasive pneumococcal infection by the long pentraxin PTX3
Source: eLife. 2023 May 24;12:e78601. doi: 10.7554/eLife.78601 (PMC10266767; doi:10.7554/eLife.78601)
Supplement: Figure 4—source data 5. [file elife-78601-fig4-data5.xlsx]

## Sheet: Panel E
Figure 4E - CFUs in lungs homogenates from WT treated with recombinant PTX3 intranasally (1μg/30μl) before the infection (prophylaxis) and 12h post-infection (treatment) with 5x10^4 CFU/mice of S. pneumoniae serotype 3 (36h post-infection)
CFU/lung	prophylaxis PBS	prophylaxis PTX3	treatment PBS	treatment PTX3
	4500000	5500000	3000000	3000000
	7800000	14000000	3000000	4100000
	7500000	210000	5700000	1500000
	16000000	5200000	3500000	1000000
	6100000	3400000	4000000	1400000
	14000000	7000000	900000	2300000
	5900000	1600000	4500000	6300000
	12000000	8800000	2700000	64000
	6700000	4000000	6500000	2200000
	2200000	3200000	1050000	3900000
	54000000	3800000	5600000	1800000
	4200000	1100000	1100000	360000
	89000000	4000000	4800000	1600000
	33000000	7000000	6100000	2300000
	2100000	3400000	8000000	13000000
	9000000	5000000	16000000	260000
	2300000	4300000	27000000	1000000
	2900000	6300000	3100000	2200000
	10800000	12000000	3700000	9000000
	6500000	2500000	2200000	4200000
	1800000	540000	310000	4900000
	15000000	4200000	2200000	5700000
		2900000	5300000	180000
		1000000	500000	1900000
		1700000	7300000	160000
		5100000	3000000	2100000
			9000000	600000
				470000
				5000000
				1900000
