# Supplementary material for: Regulation of inflammation and protection against invasive pneumococcal infection by the long pentraxin PTX3
Source: eLife. 2023 May 24;12:e78601. doi: 10.7554/eLife.78601 (PMC10266767; doi:10.7554/eLife.78601)
Supplement: Figure 5—figure supplement 1—source data 1. [file elife-78601-fig5-figsupp1-data1.xlsx]

## Sheet: Figure 5-figure supplement 1
Figure 5-figure supplement 1 - Bacterial fitness in presence of recombinant PTX3 various concerntration in the growth medium
	hours of culture	PBS			PTX3 25μg/ml			PTX3 250μg/ml
OD600nm	0	0	0	0	0	0	0	0	0	0
	3	0.056	0.042	0.068	0.05	0.042	0.054	0.056	0.04	0.056
	3.5	0.082	0.084	0.096	0.08	0.076	0.082	0.09	0.092	0.098
	4.5	0.232	0.262	0.282	0.226	0.252	0.248	0.258	0.276	0.274
	5	0.334	0.342	0.402	0.384	0.332	0.414	0.434	0.342	0.452
	5.5	0.634	0.54	0.624	0.604	0.498	0.578	0.616	0.512	0.614
	6	0.896	0.87	0.902	0.934	0.864	0.896	0.87	0.866	0.888
	6.5	1.016	1.022	1.018	1.03	0.992	0.996	1.014	0.972	1.038
	7	1.086	1.042	1.062	1.124	1.078	1.104	1.092	1.052	1.096
	7.5	1.066	1.162	1.014	1.05	1.114	1.07	1.074	1.13	1.114
