# Supplementary material for: Regulation of inflammation and protection against invasive pneumococcal infection by the long pentraxin PTX3
Source: eLife. 2023 May 24;12:e78601. doi: 10.7554/eLife.78601 (PMC10266767; doi:10.7554/eLife.78601)
Supplement: Figure 5—source data 1. [file elife-78601-fig5-data1.xlsx]

## Sheet: Panel B
Figure 5B - Opsonophagocytosis in vitro with pre-opsonized S. pneumoniae serotype 1 expressing GFP and PMN purified from human from fresh blood
	S. pneumoniae + PBS			S. pneumoniae + PTX3 10µg/ml			S. pneumoniae + PTX3 100µg/ml			S. pneumoniae + PTX3 1mg/ml
	Mean	SD	n	Mean	SD	n	Mean	SD	n	Mean	SD	n
Donor 1	2.66	0.260768	5	2.36	0.230217	5	5.96	1.24016	5	13.94	0.944987	5
Donor 2	2.64	0.669328	5	3.02	0.65192	5	3.4	1.15326	5	6.5	0.851469	5
Donor 3	2.92	0.861394	5	3.06	0.336155	5	7.36	1.2054	5	14.76	2.02435	5
Donor 4	2.16	0.304959	5	1.68	0.148324	5	2.38	0.192354	5	9.7	1.32476	5
Donor 5	1.72	0.496991	5	1.34	0.384708	5	2.2	0.824621	5	8.88	1.38816	5
Donor 6	1.62	0.286356	5	1.18	0.178885	5	1.88	0.130384	5	6.82	0.268328	5
