# Supplementary material for: Regulation of inflammation and protection against invasive pneumococcal infection by the long pentraxin PTX3
Source: eLife. 2023 May 24;12:e78601. doi: 10.7554/eLife.78601 (PMC10266767; doi:10.7554/eLife.78601)
Supplement: Figure 5—source data 2. [file elife-78601-fig5-data2.xlsx]

## Sheet: Panel C
Figure 5C - Opsonophagocytosis in vivo with WT mice infected intranasaly with pre-opsonized S. pneumoniae serotype 3 and sacrificed at indicated time point
time post-infection	6h		12h		24h		36h
treatment	PBS	PTX3	PBS	PTX3	PBS	PTX3	PBS	PTX3
CFU/lung	46000	28000	19000	23000	7000	46000	11000000	1100000
	13000	19000	32000	9000	2200000	18000	5300000	5500000
	11000	9000	40000	32000	100000	14000	8200000	2400000
	6000	28000	6000	33000	47000	68000	1230000	4100000
	44000	30000	13000	40000	80000	5000	4700000	1100000
	18000	82000	22000	16000	130000	2100000	1700000	2700000
	8000	16000	3000	56000	120000	70000	900000	1900000
	11000	78000	16000	160000	250000	13000000	9100000	3500000
	23000	11000	12000	25000	80000	190000	680000	3400000
	130000	13000	20000	16000	50000	30000	5700000	3500000
	11000	34000	11000	9000	80000	84000	14000000	2300000
	45000		20000			9000	5800000	4700000
							600000	5700000
							5000000	8000000
							6700000	6000000
								3900000
								6100000
