# Supplementary material for: Regulation of inflammation and protection against invasive pneumococcal infection by the long pentraxin PTX3
Source: eLife. 2023 May 24;12:e78601. doi: 10.7554/eLife.78601 (PMC10266767; doi:10.7554/eLife.78601)
Supplement: Figure 5—source data 3. [file elife-78601-fig5-data3.xlsx]

## Sheet: Panel D
Figure 5D - Phagocytosis in vivo with WT and Ptx3-/- mice infected with 10^6 CFU/mice of GFP-expressing S. pneumoniae (24h post-infection)
	BAL		Lung
	WT	Ptx3-/-	WT	Ptx3-/-
% PMN-GFP+ / organs	6.2	8.8	1	4.1
	11.1	13.1	2.3	2.2
	14.3	5.7	5.3	4.8
	14.6	6	3.2	3.1
	10	11.7	1.8	3
	11.5	4.6	3.2	4.9
	4.7	7.4	3.4	6.5
	7.6	10.5	5.4	9.4
	11.7	6.4	4.3	4
	6.2		3.3
	3.6		4.2
	10.8		2
			5
