# Supplementary material for: Regulation of inflammation and protection against invasive pneumococcal infection by the long pentraxin PTX3
Source: eLife. 2023 May 24;12:e78601. doi: 10.7554/eLife.78601 (PMC10266767; doi:10.7554/eLife.78601)
Supplement: Figure 5—source data 4. [file elife-78601-fig5-data4.xlsx]

## Sheet: Panel E
Figure 5E - alamarBlue based killing assay of murine blood purfied PMN with serotype 3 S. pneumoniae
incubation time	1h		3h
	WT	Ptx3-/-	WT	Ptx3-/-
% S. pneumoniae killing	76.5373	86.3016	99.4594	99.2909
	76.4795	49.7273	99.9105	87.0019
	77.9873	91.2698	99.1246	99.446
	81.4131	86.1571	99.2796	99.4953
	82.7071	88.9243	99.5334	97.5253
