# Supplementary material for: Regulation of inflammation and protection against invasive pneumococcal infection by the long pentraxin PTX3
Source: eLife. 2023 May 24;12:e78601. doi: 10.7554/eLife.78601 (PMC10266767; doi:10.7554/eLife.78601)
Supplement: Figure 6—figure supplement 1—source data 1. [file elife-78601-fig6-figsupp1-data1.xlsx]

## Sheet: Panel B
Figure 6-figure supplement 1B - MPO production kinetic in lung homogenates of WT mice intranasally infected with 5x10^4 CFU/mice of S. pneumoniae serotype 3
time post-infection (h)	MPO (ng/ml) (versus mock)
0	21.68	14.87	15.62	23.42
2	24.08	19.02	23.7	27.63
6	20.06	20.68	23.36	11.89
12	23.56	20.95	22.1	27.03
24	139.2	407.1	205.43	165.48
36	1439.47	2711.04	2130.34	1727.28
48	1408.78	1411.99	1159.34	279.92
