# Supplementary material for: Regulation of inflammation and protection against invasive pneumococcal infection by the long pentraxin PTX3
Source: eLife. 2023 May 24;12:e78601. doi: 10.7554/eLife.78601 (PMC10266767; doi:10.7554/eLife.78601)
Supplement: Figure 6—figure supplement 1—source data 2. [file elife-78601-fig6-figsupp1-data2.xlsx]

## Sheet: Panel C
Figure 6-figure supplement 1C - Neutrophil infiltration kinetic in the BAL of WT mice intranasally infected with 5x10^4 CFU/mice of S. pneumoniae serotype 3
time post-infection (h)	Neutrophils / BAL
0	2.29	306	1.13	0	174	18.5	23.5	39.2
6	34.7	46.9	87.5	215	204	594	268
12	1080	1920	1830	3750	3500	3420	4550	3720
18	3470	1310	2700	1440	11800	6560	3660	7590
24	4100	2360	674	1930	13700	2940	2670	13700
