# Supplementary material for: Regulation of inflammation and protection against invasive pneumococcal infection by the long pentraxin PTX3
Source: eLife. 2023 May 24;12:e78601. doi: 10.7554/eLife.78601 (PMC10266767; doi:10.7554/eLife.78601)
Supplement: Figure 6—figure supplement 1—source data 3. [file elife-78601-fig6-figsupp1-data3.xlsx]

## Sheet: Panel D
Figure 6-figure supplement 1D - Neutrophil infiltration kinetic in the lung of WT mice intranasally infected with 5x10^4 CFU/mice of S. pneumoniae serotype 3
time post-infection (h)	Neutrophils / lung
0	68000	40400	58300	34700
6	60100	206000	73800	129000	403000	104000	75100
12	97900	115000	163000	254000	284000	315000	198000	257000
18	109000	188000	264000
24	249000	124000	206000	189000
