# Supplementary material for: Regulation of inflammation and protection against invasive pneumococcal infection by the long pentraxin PTX3
Source: eLife. 2023 May 24;12:e78601. doi: 10.7554/eLife.78601 (PMC10266767; doi:10.7554/eLife.78601)
Supplement: Figure 6—figure supplement 1—source data 4. [file elife-78601-fig6-figsupp1-data4.xlsx]

## Sheet: Panel E
Figure 6-figure supplement 1E - Vascular damage induced by in lungs from WT and Ptx3-/- mice 18h post-infection with S. pneumoniae serotype 3
	WT	Ptx3-/-
Vascular damage score (Perivascular edema and hemorrhages)	1	0
	1	5
	3	2
	0	2
	0	3
	1	4
	0	2
	3	1
	1	1
	0	3
