# Supplementary material for: Regulation of inflammation and protection against invasive pneumococcal infection by the long pentraxin PTX3
Source: eLife. 2023 May 24;12:e78601. doi: 10.7554/eLife.78601 (PMC10266767; doi:10.7554/eLife.78601)
Supplement: Figure 6—figure supplement 1—source data 5. [file elife-78601-fig6-figsupp1-data5.xlsx]

## Sheet: Panel F
Figure 6-figure supplement 1F - Neutrophils infiltration in the respiratory tract from WT and Ptx3-/- mice 18h post-infection with S. pneumoniae serotype 1
	BAL		Lung
	WT	Ptx3-/-	WT	Ptx3-/-
Neutrophils / organ	3270	1770	700000	252000
	2510	8980	143000	327000
	5390	12100	222000	745000
	2540	22800	136000	952000
	2700	12000	422000	1250000
	4710	28400	433000	1060000
	3450	2700	216000	315000
	4590	6340	718000	824000
	4930	9450	507000	787000
	652	3770	184000	1010000
	3010		390000
	6010		420000
	2950		480000
			105000
			478000
