# Supplementary material for: Regulation of inflammation and protection against invasive pneumococcal infection by the long pentraxin PTX3
Source: eLife. 2023 May 24;12:e78601. doi: 10.7554/eLife.78601 (PMC10266767; doi:10.7554/eLife.78601)
Supplement: Figure 6—source data 1. [file elife-78601-fig6-data1.xlsx]

## Sheet: Panel B
Figure 6B - Area of inflammatory cell foci measured in lungs collected 18h and 36h post-infection from WT and Ptx3-/- mice infected with 5x10^4 CFU/mice of S. pneumoniae serotype 3
time post-infection	18h		36h
	WT	Ptx3-/-	WT	Ptx3-/-
area of foci / mice (mm2)	0.64399	1.3655	19.8932	9.3348
	0.02466	10.1404	0.1707	24.3643
	0.63165	4.54848	2.92261	12.5553
	1.3023	0.11764	1.34968	1.71046
	1.85042	3.47842	0.06372	11.8086
	0.48194	11.4514	0.69598	20.9321
	0.02874	2.45104
	1.84416	2.22965
	0.91191	0.1542
	0.43864	5.54978
