# Supplementary material for: Regulation of inflammation and protection against invasive pneumococcal infection by the long pentraxin PTX3
Source: eLife. 2023 May 24;12:e78601. doi: 10.7554/eLife.78601 (PMC10266767; doi:10.7554/eLife.78601)
Supplement: Figure 6—source data 2. [file elife-78601-fig6-data2.xlsx]

## Sheet: Panel C
Figure 6C - Inflammatory histological score measured in lungs collected 18h and 36h post-infection from WT and Ptx3-/- mice infected with 5x10^4 CFU/mice of S. pneumoniae serotype 3
time post-infection	18h		36h
	WT	Ptx3-/-	WT	Ptx3-/-
Histologica lscore	8	17	30	43
	1	65	5	51
	19	41	15	43
	12	3	7	12
	13	31	2	61
	13	23	5	22
	2	31
	13	23
	10	2
	5	56
