# Supplementary material for: Regulation of inflammation and protection against invasive pneumococcal infection by the long pentraxin PTX3
Source: eLife. 2023 May 24;12:e78601. doi: 10.7554/eLife.78601 (PMC10266767; doi:10.7554/eLife.78601)
Supplement: Figure 6—source data 3. [file elife-78601-fig6-data3.xlsx]

## Sheet: Panel D
Figure 6D - Neutrophils infiltration in the respiratory tract from WT and Ptx3-/- mice, 18h post-infection with 5x10^4 CFU/mice of S. pneumoniae serotype 3
	BAL		Lung
	WT	Ptx3-/-	WT	Ptx3-/-
Neutrophils / organ	8980	3640	320000	824000
	4510	39900	381000	377000
	10600	5480	506000	593000
	8830	20500	133000	1180000
	7730	15900	218000	378000
	12800	12200	621000	3570000
	4260	52400	195000	1670000
	11200	72900	115000	683000
	9460	22900	1440000	1320000
	4590	275000	380000	1290000
	3500	43900	379000	1030000
	4430	628	536000
	9430	90000	441000
	3760	113000	373000
	1360	24500	1240000
	651
	11700
