# Supplementary material for: Regulation of inflammation and protection against invasive pneumococcal infection by the long pentraxin PTX3
Source: eLife. 2023 May 24;12:e78601. doi: 10.7554/eLife.78601 (PMC10266767; doi:10.7554/eLife.78601)
Supplement: Figure 6—source data 4. [file elife-78601-fig6-data4.xlsx]

## Sheet: Panel E
Figure 6E - Neutrophils infiltration in the respiratory tract (18h post-infection) from WT mice treated intranasally with recombinant PTX3 (1μg/30μl) or PBS, 12h post-infection with S. pneumoniae serotype 3
	BAL		Lung
	PBS	rPTX3	PBS	rPTX3
Neutrophils / organ	41500	7130	256000	239000
	27900	10400	127000	168000
	38000	10100	183000	190000
	50200	11000	873000	706000
	36400	9460	445000	1920000
	34700	9200	610000	622000
	3280	11300	634000	112000
	13900	1750	334000	136000
	6830	3310	795000	640000
	7700	7150	905000	186000
	11600	16100	596000	78100
	20300		933000	110000
			121000	121000
			282000	110000
			145000	53600
			223000	122000
			248000	300000
			648000
