# Supplementary material for: Regulation of inflammation and protection against invasive pneumococcal infection by the long pentraxin PTX3
Source: eLife. 2023 May 24;12:e78601. doi: 10.7554/eLife.78601 (PMC10266767; doi:10.7554/eLife.78601)
Supplement: Figure 7—figure supplement 1—source data 1. [file elife-78601-fig7-figsupp1-data1.xlsx]

## Sheet: Panel A
Figure 7-figure supplement 1A - Neutrophil infiltration in the BAL of S. pneumoniae serotype 3 infected WT and Ptx3-/- mice depleted for neutrophils by an anti-Ly6G depleting antibody treatment (200μg/100μl) 12h post-infection (collected 18h post-infection)
treatment	isotype antibody		anti-Ly6G antibody
	WT	Ptx3-/-	WT	Ptx3-/-
Neutrophils/BAL	6430	11900	15800	12600
	8070	34500	8070	1890
	4420	20500	15600	17400
	3070	6540	2760	12200
	2260	9420	4480	907
	6520	6900	4630	537
	3160	31200	1950	3570
	8130	12300	2560	5170
	3230	21300	7050	10900
			9110	3670
			1150	2620
			6490
