# Supplementary material for: Regulation of inflammation and protection against invasive pneumococcal infection by the long pentraxin PTX3
Source: eLife. 2023 May 24;12:e78601. doi: 10.7554/eLife.78601 (PMC10266767; doi:10.7554/eLife.78601)
Supplement: Figure 7—figure supplement 1—source data 2. [file elife-78601-fig7-figsupp1-data2.xlsx]

## Sheet: Panel B
Figure 7-figure supplement 1B - Neutrophil infiltration in the Lung of S. pneumoniae serotype 3 infected WT and Ptx3-/- mice depleted for neutrophils by an anti-Ly6G depleting antibody treatment (200μg/100μl) 12h post-infection (collected 18h post-infection)
treatment	isotype antibody		anti-Ly6G antibody
	WT	Ptx3-/-	WT	Ptx3-/-
Neutrophils/Lung	670000	836000	301000	316000
	1040000	1080000	105000	75600
	426000	3960000	119000	159000
	633000	2670000	502000	160000
	285000	1240000	696000	409000
	1720000	2250000	448000	89400
	1230000	1430000	262000	611000
	1630000	828000	816000	664000
	2070000	3310000	932000	758000
	919000	3680000	288000	503000
		1630000	185000
			296000
