# Supplementary material for: Regulation of inflammation and protection against invasive pneumococcal infection by the long pentraxin PTX3
Source: eLife. 2023 May 24;12:e78601. doi: 10.7554/eLife.78601 (PMC10266767; doi:10.7554/eLife.78601)
Supplement: Figure 7—figure supplement 1—source data 3. [file elife-78601-fig7-figsupp1-data3.xlsx]

## Sheet: Panel C
Figure 7-figure supplement 1C - Chemoattactant production in the lung homogenates of WT and Ptx3-/- mice intranasally infected with 5x10^4 CFU/mice of S. pneumoniae serotype 3
	CXCL1		CXCL2		C3a		C5a
	WT	Ptx3-/-	WT	Ptx3-/-	WT	Ptx3-/-	WT	Ptx3-/-
protein (ng/ml)	1.15	0.48	5.64	4.82	23.68	21.04	4.91	2.42
	0.4	0.43	5.11	5.12	20.46	20.1	3.97	3.08
	0.45	0.51	4.72	5.54	19.42	18.27	2.8	4.13
	0.46	1.9	5.05	6.79	18.16	26.5	4.66	4.09
	0.38	0.63	5.73	5.59	71.78	26.46	7.34	4.05
	3.62	1.48	9.92	8.89	50.57	40.54	5.99	6.25
	0.51	0.72	5.08	5.63	65.25	33.54	6.51	4.33
	0.75	0.67	5.43	5.03	63.29	58.35	6.27	4.84
	0.75	0.37	5.12	5.48	34.75	52.76	5.07	5.22
	0.53	0.38	5.42	5.42	21.82	38.66	3.7	5.17
	0.4	0.48	5.11	4.95	26.97	57.42	6.16	6.63
	0.42	0.69	5.5	5.14	19.46	66.14	6.07	7.06
	0.49	0.46	5.59	4.93	40.95	83.3	7.42	9.01
	0.43	0.56	5.82	4.76	22.4	42.83	5.03	4.9
	0.47	0.32	5.25	4.89	45.82	27.25	6.41	4.96
	0.4	0.25	4.98	4.79	118.91	96.67	11.38	9.31
	0.52	0.37	7.54	6.11	86.01	45.13	5.94	6.48
	1.83	0.46	7.6	6.18	75.14	36.89	5.73	6.29
	0.54	1.22	6.21	6.04	92.76	73.65	7.06	8.09
	0.5	0.69	4.94	5.68	47.06	60.35	5.87	8.03
