# Supplementary material for: Regulation of inflammation and protection against invasive pneumococcal infection by the long pentraxin PTX3
Source: eLife. 2023 May 24;12:e78601. doi: 10.7554/eLife.78601 (PMC10266767; doi:10.7554/eLife.78601)
Supplement: Figure 7—figure supplement 1—source data 4. [file elife-78601-fig7-figsupp1-data4.xlsx]

## Sheet: Panel D
Figure 7-figure supplement 1D - C3d level in lung homogenates collected 36h post-infection with S. pneumoniae serotype 3 from WT and Ptx3-/- mice, detected by western blot and normalized with vinculin expression
	WT	Ptx3-/-
C3d/Vinculin (A.U)	0.148	0.155
	0.339	0.134
	0.297	0.123
	0.2	0.0914
	0.442	0.247
	0.396	0.257
	0.199	0.404
	0.665	0.304
