# Supplementary material for: Regulation of inflammation and protection against invasive pneumococcal infection by the long pentraxin PTX3
Source: eLife. 2023 May 24;12:e78601. doi: 10.7554/eLife.78601 (PMC10266767; doi:10.7554/eLife.78601)
Supplement: Figure 7—figure supplement 1—source data 5. [file elife-78601-fig7-figsupp1-data5.xlsx]

## Sheet: Panel E
Figure 7-figure supplement 1E - P-selectin expression in lung homogenates of WT and Ptx3-/- mice intranasally infected with 5x10^4 CFU/mice of S. pneumoniae serotype 3 (collected 36h post-infection)
	WT	Ptx3-/-	WT	Ptx3-/-
P-selectin (ng/ml)	152.59	232.34	167.62	163.77
	293.22	179.33	133.08	130.5
	151.45	266.23	143.38	155.86
	192.73	267.64	156.64	145.41
	216.6	77.12	153.74	190.7
			135.84	188.57
			185.97
			174.11
			168.19
