# Supplementary material for: Regulation of inflammation and protection against invasive pneumococcal infection by the long pentraxin PTX3
Source: eLife. 2023 May 24;12:e78601. doi: 10.7554/eLife.78601 (PMC10266767; doi:10.7554/eLife.78601)
Supplement: Figure 7—figure supplement 1—source data 6. [file elife-78601-fig7-figsupp1-data6.xlsx]

## Sheet: Panel F
Figure 7-figure supplement 1F - Neutrophil infiltration in the BAL of S. pneumoniae serotype 3 infected WT and Ptx3-/- mice treated with an anti-CD62P antibody (50μg/100μl) 12h post-infection (collected 18h post-infection)
treatment	isotype antibody		anti-CD62P antibody
	WT	Ptx3-/-	WT	Ptx3-/-
Neutrophils/BAL	6480	20300	3540	1850
	10200	24000	933	1720
	3440	21500	2090	1470
	3750	26500	1220	1550
	6180	12400	7300	3190
	3080	30800	3010	541
	479	9820	1940	8800
	16300	9430	5460	594
