# Supplementary material for: Regulation of inflammation and protection against invasive pneumococcal infection by the long pentraxin PTX3
Source: eLife. 2023 May 24;12:e78601. doi: 10.7554/eLife.78601 (PMC10266767; doi:10.7554/eLife.78601)
Supplement: Figure 7—figure supplement 1—source data 7. [file elife-78601-fig7-figsupp1-data7.xlsx]

## Sheet: Panel G
Figure 7-figure supplement 1G - Neutrophil infiltration in the lung of S. pneumoniae serotype 3 infected WT and Ptx3-/- mice treated with an anti-CD62P antibody (50μg/100μl) 12h post-infection (collected 18h post-infection)
treatment	isotype antibody		anti-CD62P antibody
	WT	Ptx3-/-	WT	Ptx3-/-
Neutrophils/Lung	1340000	3750000	849000	1140000
	951000	5230000	856000	834000
	2680000	3420000	1660000	1130000
	1480000	2610000	883000	947000
	501000	1090000	694000	877000
	354000	2890000	1190000	896000
	422000	1150000	523000	479000
	677000	2480000	466000	586000
