# Supplementary material for: Regulation of inflammation and protection against invasive pneumococcal infection by the long pentraxin PTX3
Source: eLife. 2023 May 24;12:e78601. doi: 10.7554/eLife.78601 (PMC10266767; doi:10.7554/eLife.78601)
Supplement: Figure 7—source data 1. [file elife-78601-fig7-data1.xlsx]

## Sheet: Panel A
Figure 7A - Local bacterial load after neutrophil depletion (12h post-infection 200μg/100μl of anti-Ly6G or isotype control antibodies) in respiratory tract of WT and Ptx3-/- mice 36h post-infection with 5x10^4 CFU/mice of S. pneumoniae serotype 3
treatment	isotype antibody		anti-Ly6G antibody
	WT	Ptx3-/-	WT	Ptx3-/-
CFU/Lung	740000	16000000	6800000	19000000
	3400000	24000000	160000	52000000
	3600000	14000000	8400000	6400000
	9800000	22000000	8000000	9400000
	7600000	13200000	3200000	7800000
	280000	18000000	7800000	760000
	8000000	9200000	1600000	12000000
	4800000	10600000	1600000	9400000
	9600000	30000000	10400000	3400000
	13600000	10000000	20000	2000000
	16800000	20000000	12000000	340000
	10600000	4000000	7000000	22600000
	740000	2200000	1200000	6200000
	5800000	4100000	11400000	5200000
	16000000	7000000	3200000	15600000
	5800000	5000000	70000	1100000
	3300000	8000000	500000	2100000
	3400000	2300000	4500000	1700000
	1600000	9000000	6000	270000
	3100000	2900000	110000	1200000
	3900000	2200000	500000	40000
	1700000	900000	900000	900000
	430000	1100000	500000	380000
	2700000	1700000	2300000	800000
	2100000	4300000	430000	9000
	3700000	15000000	1100000	6000
	2000000		670000	6000000
	1300000		7700000	150000
	3300000		2500000	1900000
	390000		350000	3000
	3700000		800000	340000
	1000000		1900000	260000
	7900000		400000	1100000
	600000		700000	1500000
			4700000	14000
