# Supplementary material for: Regulation of inflammation and protection against invasive pneumococcal infection by the long pentraxin PTX3
Source: eLife. 2023 May 24;12:e78601. doi: 10.7554/eLife.78601 (PMC10266767; doi:10.7554/eLife.78601)
Supplement: Figure 7—source data 2. [file elife-78601-fig7-data2.xlsx]

## Sheet: Panel B
Figure 7B - Systemic bacterial load after neutrophil depletion (12h post-infection 200μg/100μl of anti-Ly6G or isotype control antibodies) in the spleen of WT and Ptx3-/- mice 36h post-infection with 5x10^4 CFU/mice of S. pneumoniae serotype 3
treatment	isotype antibody		anti-Ly6G antibody
	WT	Ptx3-/-	WT	Ptx3-/-
CFU/spleen	10	8800	20	40
	60	1200	10	7120
	20	9800	10	180
	20	58000	10	360
	3400	800	10	40
	10	2400	10	100
	400	340	10	3920
	80	1600	10	1800
	620	4200	40	10
	72000	46000	160	340
	66000	300	140	80
	280	1200	5720	6080
	2800	3800	10	10
	10	700	180	20
	1360	3100	180	940
	10	4000	10	10
	20000	10	100	10
	20	2400	1300	10
	20	10	10	10
	1300	5000	10	10
	20	26000	20	2000
	40	10	10	10
	1700	22000	20000	100
	100	300	30	1000
	10	600	10	10
	10	9000	10	10
	30	400	20	42000
	400	169000	200	200
	10	14000	20	20
	22000	590	10	10
	90	82000	10	200
	800	236000	30	10
	70		10	28000
	1300		10	70
	400000		51000
	1800
	370
