# Supplementary material for: Regulation of inflammation and protection against invasive pneumococcal infection by the long pentraxin PTX3
Source: eLife. 2023 May 24;12:e78601. doi: 10.7554/eLife.78601 (PMC10266767; doi:10.7554/eLife.78601)
Supplement: Figure 7—source data 3. [file elife-78601-fig7-data3.xlsx]

## Sheet: Panel C
Figure 7C - Transmigration of human purified neutrophils towards S. pneumoniae after recombinant PTX3 (100 μg/ml) and/or anti-CD62L (100 μg/ml) treatments
	S. pneumoniae + isotype	S. pneumoniae + PTX3	S. pneumoniae + αCD62P	S. pneumoniae + αCD62P + PTX3
% transmigrated Neutrophils (vs control)	99,1	99,1	99,1	99,1
	88.8	65.4	52.4	48.3
	100	66.7	53.3	56.7
	103.3	66.7	46.7	50.51
	96.7	61.7	55	62.29
	99.33	58.3	70.71	62.29
	85.86	67.34	48.82	53.87
	119.53	47.14	53.87	70.71
	79.12	58.92	60.61	58.92
	116.16	53.87	70.71	77.44
