# Supplementary material for: Regulation of inflammation and protection against invasive pneumococcal infection by the long pentraxin PTX3
Source: eLife. 2023 May 24;12:e78601. doi: 10.7554/eLife.78601 (PMC10266767; doi:10.7554/eLife.78601)
Supplement: Figure 7—source data 4. [file elife-78601-fig7-data4.xlsx]

## Sheet: Panel D
Figure 7D - Local bacterial load after recombinant PTX3 treatment (1 μg/mice) or PBS in WT and P-selectin deficient mice 36h post-infection with 5x10^4 CFU/mice of S. pneumoniae serotype 3
treatment	PBS		rPTX3
	WT	Selp-/-	WT	Selp-/-
CFU/Lung	21000000	1100000	6800000	500000
	5000000	2100000	1300000	1500000
	17000000	800000	1400000	2800000
	3000000	600000	2400000	1600000
	6000000	3200000	500000	1100000
	14000000	2000000	4900000	1200000
	4100000	13000000	2500000	13000000
	24000000	4200000	2800000	4900000
	3200000	3900000	1900000	9000000
	13000000	6000000	11000000	3500000
	4600000		5000000
