# Supplementary material for: Regulation of inflammation and protection against invasive pneumococcal infection by the long pentraxin PTX3
Source: eLife. 2023 May 24;12:e78601. doi: 10.7554/eLife.78601 (PMC10266767; doi:10.7554/eLife.78601)
Supplement: Figure 7—source data 5. [file elife-78601-fig7-data5.xlsx]

## Sheet: Panel E
Figure 7E - Local bacterial load after neutrophil depletion (12h post-infection 50μg/100μl of anti-CD62P or isotype control antibodies) in respiratory tract of WT and Ptx3-/- mice 36h post-infection with 5x10^4 CFU/mice of S. pneumoniae serotype 3
treatment	isotype antibody		anti-CD62P antibody
	WT	Ptx3-/-	WT	Ptx3-/-
CFU/Lung	5300000	9000000	3900000	16000000
	3200000	15000000	24000000	1800000
	16000000	34000000	17000000	4700000
	4700000	54000000	3100000	4900000
	13000000	7000000	5400000	10100000
	5200000	26000000	6800000	4400000
	4800000	36000000	4200000	14000000
	1200000	35000000	13000000	6000000
	720000	30000000	7000000	15000000
	1300000	53000000	5800000	5300000
	27000000	34000000	4900000	3200000
	18000000	2400000	7400000	1200000
	3100000
