# Supplementary material for: Regulation of inflammation and protection against invasive pneumococcal infection by the long pentraxin PTX3
Source: eLife. 2023 May 24;12:e78601. doi: 10.7554/eLife.78601 (PMC10266767; doi:10.7554/eLife.78601)
Supplement: Figure 7—source data 6. [file elife-78601-fig7-data6.xlsx]

## Sheet: Panel F
Figure 7F - Systemic bacterial load after neutrophil depletion (12h post-infection 50μg/100μl of anti-CD62P or isotype control antibodies) in the spleen of WT and Ptx3-/- mice 36h post-infection with 5x10^4 CFU/mice of S. pneumoniae serotype 3
treatment	isotype antibody		anti-CD62P antibody
	WT	Ptx3-/-	WT	Ptx3-/-
CFU/spleen	60	90	5	150
	5	20	50	5
	10	2600	350	5
	30	38000	80	5
	5	290	5	80
	5	700	120	5
	40	9000	70	20000
	5	36000	50	120
	100	120	50	2300
	20	40	50	30
	90	110000	20	30
	800	50	420	90
	200
