# Supplementary material for: Regulation of inflammation and protection against invasive pneumococcal infection by the long pentraxin PTX3
Source: eLife. 2023 May 24;12:e78601. doi: 10.7554/eLife.78601 (PMC10266767; doi:10.7554/eLife.78601)
Supplement: Figure 7—source data 7. [file elife-78601-fig7-data7.xlsx]

## Sheet: Panel G
Figure 7G - CFUs in lungs homogenates from WT, Ptx3-/-, Selp-/- and Ptx3-/-Selp-/- mice infected intranasally with 5x10^4 CFU/mice of S. pneumoniae serotype 3 (36h post-infection)
	WT	Ptx3-/-	Selp-/-	Ptx3-/-Selp-/-
CFU/Lung	54000000	76000000	2400000	2300000
	19000000	32000000	1600000	4700000
	6600000	51000000	6700000	2700000
	8500000	75000000	1000000	5400000
	2700000	18000000	900000	5900000
	18000000	25000000	4100000	1800000
	4100000	23000000	7300000	1100000
	2400000	38000000	13000000	1200000
	5800000	19000000		11400000
	3900000	22000000		3200000
	7800000	14000000		2200000
				6900000
