# Supplementary material for: Regulation of inflammation and protection against invasive pneumococcal infection by the long pentraxin PTX3
Source: eLife. 2023 May 24;12:e78601. doi: 10.7554/eLife.78601 (PMC10266767; doi:10.7554/eLife.78601)
Supplement: Figure 7—source data 8. [file elife-78601-fig7-data8.xlsx]

## Sheet: Panel H
Figure 7H - Systemic bacterial load in spleen homogenates from WT, Ptx3-/-, Selp-/- and Ptx3-/-Selp-/- mice infected intranasally with 5x10^4 CFU/mice of S. pneumoniae serotype 3 (36h post-infection)
	WT	Ptx3-/-	Selp-/-	Ptx3-/-Selp-/-
CFU/spleen	30	410	40	10
	10	1700	50	90
	10	280	1600	20
	80	41000	190	70
	60	330	10	280
	110	80	600	0
	20	420	10	700
	5	6300	50	50
	40	800		110
	20	10		210
	600	1800		120
				110
