# Supplementary material for: Regulation of inflammation and protection against invasive pneumococcal infection by the long pentraxin PTX3
Source: eLife. 2023 May 24;12:e78601. doi: 10.7554/eLife.78601 (PMC10266767; doi:10.7554/eLife.78601)
Supplement: Figure 8—figure supplement 1—source data 1. [file elife-78601-fig8-figsupp1-data1.xlsx]

## Sheet: Panel A
Figure 8-figure supplement 1 - P-selectin level in IPD patients’ sera.
Haplotypes	ACA	AAA	AAG	GAG
P-selectin (ng/ml)	27.25	43.75	243.22	89.59
	243.22	85.18	49.26	130.64
	130.64	113.5		59.12
	47.06	120.15		47.06
	85.18	123.39		43.75
	97.48	127.8		97.48
	120.15			113.5
	123.39			113.6
	113.6			54.37
	52.93			55.75
	54.85			54.85
	64.66			64.66
	127.8			39.42
	49.26			66.61
	164.94			104.04
				86.17
				56.02
				164.94
