# Supplementary material for: Regulation of inflammation and protection against invasive pneumococcal infection by the long pentraxin PTX3
Source: eLife. 2023 May 24;12:e78601. doi: 10.7554/eLife.78601 (PMC10266767; doi:10.7554/eLife.78601)
Supplement: Figure 8—source data 2. [file elife-78601-fig8-data2.xlsx]

## Sheet: Panel B
Figure 8B - size exclusion chromatography for the two allelic variants of recombinant PTX3
		Volume (ml)	A48	D48
		0	-0.64	-0.01
		0.02	0.38	0.17
		0.04	2.69	1.48
		0.06	3.01	1.66
		0.09	2.27	1.32
		0.11	1.92	1.07
		0.13	1.58	0.88
		0.15	1.41	0.71
		0.17	1.18	0.62
		0.19	1.11	0.6
		0.22	0.94	0.47
		0.24	0.91	0.44
		0.26	0.85	0.41
		0.28	0.78	0.36
		0.3	0.78	0.34
		0.32	0.74	0.31
		0.35	0.7	0.31
		0.37	0.63	0.31
		0.39	0.55	0.31
		0.41	0.57	0.23
		0.43	0.61	0.21
		0.45	0.55	0.24
		0.48	0.53	0.22
		0.5	0.58	0.18
		0.52	0.57	0.23
		0.54	0.57	0.14
		0.56	0.55	0.17
		0.58	0.52	0.23
		0.6	0.51	0.15
		0.63	0.5	0.2
		0.65	0.47	0.14
		0.67	0.5	0.1
		0.69	0.44	0.12
		0.71	0.45	0.16
		0.73	0.43	0.08
		0.76	0.45	0.07
		0.78	0.44	0.07
		0.8	0.43	0.08
		0.82	0.42	0.01
		0.84	0.42	0.03
		0.86	0.44	0.02
		0.89	0.43	-0.04
		0.91	0.4	-0.07
		0.93	0.39	-0.07
		0.95	0.4	-0.08
		0.97	0.33	-0.1
		0.99	0.34	-0.1
		1.02	0.3	-0.07
		1.04	0.34	-0.12
		1.06	0.31	-0.07
		1.08	0.33	-0.14
		1.1	0.29	-0.2
		1.12	0.33	-0.13
		1.15	0.4	-0.12
		1.17	0.35	-0.19
		1.19	0.34	-0.17
		1.21	0.33	-0.23
		1.23	0.34	-0.23
		1.25	0.3	-0.23
		1.27	0.29	-0.25
		1.3	0.28	-0.25
		1.32	0.2	-0.26
		1.34	0.22	-0.26
		1.36	0.27	-0.23
		1.38	0.19	-0.32
		1.4	0.21	-0.31
		1.43	0.21	-0.31
		1.45	0.26	-0.3
		1.47	0.22	-0.33
		1.49	0.19	-0.36
		1.51	0.19	-0.36
		1.53	0.17	-0.2
		1.56	0.18	-0.26
		1.58	0.13	-0.34
		1.6	0.18	-0.3
		1.62	0.21	-0.24
		1.64	0.2	-0.29
		1.66	0.2	-0.29
		1.69	0.19	-0.23
		1.71	0.19	-0.35
		1.73	0.24	-0.29
		1.75	0.21	-0.34
		1.77	0.28	-0.28
		1.79	0.28	-0.28
		1.81	0.2	-0.28
		1.84	0.16	-0.28
		1.86	0.19	-0.35
		1.88	0.11	-0.35
		1.9	0.15	-0.33
		1.92	0.13	-0.43
		1.94	0.05	-0.39
		1.97	0.03	-0.38
		1.99	0.02	-0.38
		2.01	0.03	-0.42
		2.03	0.03	-0.45
		2.05	0.03	-0.44
		2.07	0.07	-0.5
		2.1	0.06	-0.52
		2.12	0.02	-0.5
		2.14	-0.01	-0.44
		2.16	-0.01	-0.5
		2.18	-0.03	-0.51
		2.2	-0.02	-0.5
		2.23	-0.06	-0.47
		2.25	-0.02	-0.46
		2.27	-0.04	-0.51
		2.29	-0.04	-0.48
		2.31	-0.06	-0.47
		2.33	-0.07	-0.44
		2.35	-0.07	-0.46
		2.38	-0.03	-0.47
		2.4	-0.07	-0.41
		2.42	-0.08	-0.51
		2.44	-0.06	-0.54
		2.46	-0.01	-0.53
		2.48	-0.01	-0.57
		2.51	-0.02	-0.56
		2.53	-0.04	-0.52
		2.55	-0.03	-0.49
		2.57	0.02	-0.52
		2.59	0.03	-0.54
		2.61	-0.04	-0.49
		2.64	-0.09	-0.5
		2.66	0.01	-0.52
		2.68	0.03	-0.47
		2.7	-0.1	-0.49
		2.72	0.04	-0.5
		2.74	-0.05	-0.55
		2.77	-0.01	-0.49
		2.79	0.04	-0.54
		2.81	-0.06	-0.53
		2.83	-0.01	-0.57
		2.85	0.04	-0.53
		2.87	-0.04	-0.57
		2.9	-0.08	-0.53
		2.92	-0.03	-0.66
		2.94	-0.09	-0.65
		2.96	0	-0.63
		2.98	-0.08	-0.65
		3	-0.1	-0.7
		3.02	-0.11	-0.72
		3.05	-0.15	-0.73
		3.07	-0.15	-0.67
		3.09	-0.17	-0.68
		3.11	-0.06	-0.67
		3.13	-0.16	-0.66
		3.15	-0.18	-0.68
		3.18	-0.19	-0.7
		3.2	-0.19	-0.72
		3.22	-0.19	-0.75
		3.24	-0.17	-0.79
		3.26	-0.2	-0.82
		3.28	-0.19	-0.78
		3.31	-0.2	-0.74
		3.33	-0.23	-0.76
		3.35	-0.2	-0.74
		3.37	-0.13	-0.71
		3.39	-0.15	-0.7
		3.41	-0.16	-0.75
		3.44	-0.13	-0.77
		3.46	-0.11	-0.82
		3.48	-0.15	-0.83
		3.5	-0.2	-0.82
		3.52	-0.16	-0.79
		3.54	-0.19	-0.81
		3.56	-0.18	-0.79
		3.59	-0.17	-0.79
		3.61	-0.15	-0.82
		3.63	-0.13	-0.78
		3.65	-0.22	-0.82
		3.67	-0.18	-0.73
		3.69	-0.12	-0.73
		3.72	-0.16	-0.75
		3.74	-0.14	-0.74
		3.76	-0.13	-0.84
		3.78	-0.12	-0.72
		3.8	-0.16	-0.78
		3.82	-0.19	-0.74
		3.85	-0.16	-0.77
		3.87	-0.17	-0.72
		3.89	-0.24	-0.77
		3.91	-0.17	-0.71
		3.93	-0.2	-0.7
		3.95	-0.15	-0.81
		3.98	-0.18	-0.82
		4	-0.26	-0.8
		4.02	-0.28	-0.84
		4.04	-0.23	-0.87
		4.06	-0.3	-0.93
		4.08	-0.26	-0.8
		4.1	-0.26	-0.77
		4.13	-0.29	-0.9
		4.15	-0.29	-0.88
		4.17	-0.35	-0.84
		4.19	-0.37	-0.86
		4.21	-0.32	-0.86
		4.23	-0.31	-0.86
		4.26	-0.32	-0.89
		4.28	-0.35	-0.83
		4.3	-0.31	-0.86
		4.32	-0.29	-0.84
		4.34	-0.36	-0.86
		4.36	-0.33	-0.92
		4.39	-0.35	-0.87
		4.41	-0.35	-0.9
		4.43	-0.36	-0.94
		4.45	-0.31	-0.93
		4.47	-0.3	-0.92
		4.49	-0.32	-0.85
		4.52	-0.32	-0.9
		4.54	-0.31	-0.9
		4.56	-0.39	-0.9
		4.58	-0.34	-0.96
		4.6	-0.35	-0.89
		4.62	-0.33	-0.89
		4.64	-0.34	-0.94
		4.67	-0.36	-0.86
		4.69	-0.36	-0.77
		4.71	-0.36	-0.8
		4.73	-0.26	-0.81
		4.75	-0.31	-0.79
		4.77	-0.32	-0.83
		4.8	-0.36	-0.82
		4.82	-0.34	-0.8
		4.84	-0.29	-0.87
		4.86	-0.32	-0.79
		4.88	-0.32	-0.8
		4.9	-0.32	-0.82
		4.93	-0.25	-0.84
		4.95	-0.35	-0.81
		4.97	-0.38	-0.89
		4.99	-0.38	-0.9
		5.01	-0.38	-0.92
		5.03	-0.36	-0.89
		5.06	-0.39	-0.91
		5.08	-0.35	-0.91
		5.1	-0.4	-0.9
		5.12	-0.39	-0.83
		5.14	-0.41	-0.82
		5.16	-0.36	-0.95
		5.19	-0.37	-0.92
		5.21	-0.35	-0.91
		5.23	-0.41	-0.9
		5.25	-0.39	-0.95
		5.27	-0.4	-0.91
		5.29	-0.43	-0.95
		5.31	-0.41	-0.94
		5.34	-0.43	-0.94
		5.36	-0.42	-0.98
		5.38	-0.4	-0.92
		5.4	-0.41	-0.95
		5.42	-0.42	-0.92
		5.44	-0.42	-0.97
		5.47	-0.44	-1.03
		5.49	-0.47	-1
		5.51	-0.5	-0.96
		5.53	-0.48	-0.98
		5.55	-0.44	-0.99
		5.57	-0.48	-1
		5.6	-0.48	-1.01
		5.62	-0.49	-1
		5.64	-0.48	-0.98
		5.66	-0.43	-0.94
		5.68	-0.42	-0.99
		5.7	-0.4	-0.96
		5.73	-0.42	-0.93
		5.75	-0.39	-0.91
		5.77	-0.35	-0.92
		5.79	-0.28	-0.95
		5.81	-0.38	-0.95
		5.83	-0.31	-0.97
		5.85	-0.4	-0.95
		5.88	-0.38	-1
		5.9	-0.34	-1
		5.92	-0.36	-0.93
		5.94	-0.37	-0.93
		5.96	-0.43	-0.98
		5.98	-0.43	-0.98
		6.01	-0.38	-1.03
		6.03	-0.47	-1.01
		6.05	-0.46	-1.06
		6.07	-0.5	-1.04
		6.09	-0.49	-1.04
		6.11	-0.52	-0.94
		6.14	-0.37	-0.95
		6.16	-0.37	-0.98
		6.18	-0.42	-1
		6.2	-0.5	-1.02
		6.22	-0.45	-1.06
		6.24	-0.49	-1.03
		6.27	-0.46	-1.07
		6.29	-0.46	-1.06
		6.31	-0.45	-1.02
		6.33	-0.49	-1.06
		6.35	-0.46	-1.06
		6.37	-0.44	-1.06
		6.39	-0.49	-1.06
		6.42	-0.53	-1.07
		6.44	-0.55	-1.06
		6.46	-0.56	-1.09
		6.48	-0.54	-1.06
		6.5	-0.57	-1.04
		6.52	-0.6	-1.04
		6.55	-0.53	-0.98
		6.57	-0.55	-0.99
		6.59	-0.57	-1.02
		6.61	-0.53	-1.02
		6.63	-0.54	-0.97
		6.65	-0.55	-0.97
		6.68	-0.53	-0.96
		6.7	-0.53	-0.99
		6.72	-0.52	-0.98
		6.74	-0.44	-0.92
		6.76	-0.56	-0.89
		6.78	-0.53	-0.88
		6.81	-0.54	-0.88
		6.83	-0.53	-0.92
		6.85	-0.48	-0.91
		6.87	-0.52	-0.84
		6.89	-0.51	-0.85
		6.91	-0.54	-0.78
		6.94	-0.5	-0.75
		6.96	-0.53	-0.78
		6.98	-0.47	-0.77
		7	-0.57	-0.67
		7.02	-0.43	-0.69
		7.04	-0.51	-0.67
		7.06	-0.5	-0.65
		7.09	-0.47	-0.58
		7.11	-0.53	-0.53
		7.13	-0.52	-0.48
		7.15	-0.46	-0.41
		7.17	-0.44	-0.31
		7.19	-0.51	-0.19
		7.22	-0.45	-0.12
		7.24	-0.47	-0.02
		7.26	-0.48	0.12
		7.28	-0.48	0.24
		7.3	-0.38	0.44
		7.32	-0.37	0.68
		7.35	-0.31	0.94
		7.37	-0.21	1.2
		7.39	-0.13	1.6
		7.41	0.01	2.09
		7.43	0.17	2.74
		7.45	0.48	3.63
		7.48	1.12	4.82
		7.5	1.98	6.48
		7.52	2.63	8.62
		7.54	3.62	11.24
		7.56	4.96	14.4
		7.58	6.49	17.68
		7.6	8.15	21
		7.63	9.58	24.07
		7.65	10.94	26.7
		7.67	12.05	28.71
		7.69	12.8	30.13
		7.71	13.34	30.95
		7.73	13.7	31.26
		7.76	13.8	31.35
		7.78	13.89	31.12
		7.8	13.76	30.73
		7.82	13.64	30.29
		7.84	13.52	29.8
		7.86	13.42	29.29
		7.89	13.28	28.82
		7.91	13.21	28.43
		7.93	13.15	28.04
		7.95	13.17	27.8
		7.97	13.05	27.57
		7.99	13.21	27.42
		8.02	13.36	27.3
		8.04	13.43	27.32
		8.06	13.53	27.36
		8.08	13.72	27.46
		8.1	13.97	27.6
		8.12	14.24	27.82
		8.14	14.5	28.08
		8.17	14.86	28.39
		8.19	15.18	28.72
		8.21	15.49	29.03
		8.23	15.83	29.51
		8.25	16.15	29.88
		8.27	16.57	30.33
		8.3	17	30.78
		8.32	17.41	31.27
		8.34	17.88	31.73
		8.36	18.29	32.28
		8.38	18.71	32.89
		8.4	19.16	33.39
		8.43	19.61	33.94
		8.45	20.04	34.48
		8.47	20.56	35.04
		8.49	20.95	35.66
		8.51	21.47	36.31
		8.53	21.9	36.91
		8.56	22.33	37.51
		8.58	22.78	38.14
		8.6	23.24	38.75
		8.62	23.74	39.39
		8.64	24.1	40.1
		8.66	24.64	40.76
		8.69	25.08	41.42
		8.71	25.48	42.11
		8.73	25.97	42.8
		8.75	26.39	43.55
		8.77	26.71	44.37
		8.79	27.25	45.15
		8.81	27.68	45.97
		8.84	28.1	46.77
		8.86	28.59	47.64
		8.88	29.04	48.51
		8.9	29.43	49.36
		8.92	29.9	50.36
		8.94	30.32	51.25
		8.97	30.69	52.18
		8.99	31.13	53.17
		9.01	31.54	54.09
		9.03	31.95	55.03
		9.05	32.42	56.05
		9.07	32.91	57.07
		9.1	33.29	58.05
		9.12	33.67	59.04
		9.14	34.06	60.08
		9.16	34.42	61.05
		9.18	34.79	61.99
		9.2	35.09	63.07
		9.23	35.53	64.03
		9.25	35.96	64.88
		9.27	36.34	65.87
		9.29	36.72	66.77
		9.31	37.04	67.62
		9.33	37.42	68.56
		9.35	37.75	69.37
		9.38	38.12	70.18
		9.4	38.48	70.91
		9.42	38.9	71.72
		9.44	39.37	72.48
		9.46	39.89	73.14
		9.48	40.36	73.89
		9.51	40.93	74.6
		9.53	41.54	75.34
		9.55	42.24	75.93
		9.57	43.03	76.62
		9.59	43.89	77.31
		9.61	44.95	78.14
		9.64	46.08	78.98
		9.66	47.41	79.85
		9.68	48.91	80.86
		9.7	50.57	81.91
		9.72	52.49	83.16
		9.74	54.62	84.47
		9.77	57.07	86.03
		9.79	59.7	87.78
		9.81	62.75	89.71
		9.83	66.12	91.86
		9.85	69.79	94.33
		9.87	73.87	96.97
		9.89	78.2	100.02
		9.92	83.06	103.37
		9.94	88.17	107.06
		9.96	93.89	111.1
		9.98	99.68	115.45
		10	106.39	120.37
		10.02	113.05	125.54
		10.05	120.21	131.13
		10.07	127.77	136.95
		10.09	135.86	143.46
		10.11	144.1	150.04
		10.13	152.57	157.31
		10.15	161.58	164.63
		10.18	170.45	172.48
		10.2	179.93	180.57
		10.22	189.16	188.97
		10.24	198.98	197.51
		10.26	208.46	206.18
		10.28	218.1	215.24
		10.31	227.65	224.13
		10.33	237.2	233.36
		10.35	246.48	242.46
		10.37	255.71	251.59
		10.39	264.63	260.44
		10.41	273.07	269.46
		10.44	281.44	278.07
		10.46	289.15	286.31
		10.48	296.64	294.34
		10.5	303.29	302.05
		10.52	309.84	309.42
		10.54	315.5	316.33
		10.56	320.83	322.67
		10.59	325.37	328.41
		10.61	329.22	333.92
		10.63	332.65	338.64
		10.65	335.44	342.71
		10.67	337.26	346.24
		10.69	338.57	349.17
		10.72	339.33	351.39
		10.74	339.41	352.97
		10.76	338.81	353.83
		10.78	337.46	354.11
		10.8	335.63	353.66
		10.82	333.29	352.77
		10.85	330.28	351
		10.87	326.83	348.84
		10.89	322.7	346.04
		10.91	318.26	342.89
		10.93	313.52	338.84
		10.95	308.17	334.64
		10.98	302.73	329.8
		11	296.71	324.6
		11.02	290.54	319
		11.04	284.17	313.14
		11.06	277.64	307.02
		11.08	270.6	300.33
		11.1	263.71	293.67
		11.13	256.6	286.6
		11.15	249.47	279.64
		11.17	242.24	272.44
		11.19	234.87	265.16
		11.21	227.76	257.49
		11.23	220.3	250.07
		11.26	213.3	242.52
		11.28	205.87	235.12
		11.3	199.04	227.69
		11.32	191.85	220.27
		11.34	185.15	212.89
		11.36	178.28	205.58
		11.39	171.75	198.54
		11.41	165.08	191.38
		11.43	158.89	184.54
		11.45	152.76	177.68
		11.47	146.65	171.18
		11.49	140.9	164.59
		11.52	135.11	158.42
		11.54	129.7	152.23
		11.56	124.39	146.32
		11.58	119.26	140.6
		11.6	114.19	134.87
		11.62	109.47	129.5
		11.64	104.88	124.15
		11.67	100.42	119.24
		11.69	96.18	114.21
		11.71	92.08	109.62
		11.73	88.05	104.96
		11.75	84.26	100.74
		11.77	80.67	96.44
		11.8	77.18	92.55
		11.82	73.95	88.62
		11.84	70.71	84.9
		11.86	67.79	81.43
		11.88	64.78	78.05
		11.9	62.09	74.88
		11.93	59.46	71.73
		11.95	56.98	68.77
		11.97	54.54	65.91
		11.99	52.28	63.28
		12.01	50.21	60.69
		12.03	48.11	58.25
		12.06	46.19	55.86
		12.08	44.31	53.68
		12.1	42.58	51.57
		12.12	40.89	49.58
		12.14	39.36	47.66
		12.16	37.77	45.82
		12.18	36.36	44.12
		12.21	35.04	42.44
		12.23	33.73	40.87
		12.25	32.61	39.31
		12.27	31.49	38
		12.29	30.42	36.7
		12.31	29.42	35.48
		12.34	28.53	34.2
		12.36	27.63	33.04
		12.38	26.75	31.99
		12.4	25.95	30.88
		12.42	25.27	29.97
		12.44	24.55	29.06
		12.47	23.86	28.18
		12.49	23.21	27.31
		12.51	22.58	26.52
		12.53	21.99	25.73
		12.55	21.41	24.98
		12.57	20.86	24.37
		12.6	20.3	23.68
		12.62	19.83	22.98
		12.64	19.29	22.32
		12.66	18.81	21.72
		12.68	18.37	21.21
		12.7	17.92	20.63
		12.73	17.46	20.08
		12.75	17.07	19.52
		12.77	16.63	19.01
		12.79	16.21	18.44
		12.81	15.74	17.96
		12.83	15.32	17.43
		12.85	14.87	16.93
		12.88	14.52	16.5
		12.9	14.12	16.05
		12.92	13.71	15.56
		12.94	13.33	15.1
		12.96	12.94	14.66
		12.98	12.52	14.2
		13.01	12.18	13.79
		13.03	11.77	13.37
		13.05	11.38	12.96
		13.07	11.05	12.51
		13.09	10.72	12.08
		13.11	10.37	11.67
		13.14	10.03	11.29
		13.16	9.69	10.89
		13.18	9.38	10.5
		13.2	9.05	10.1
		13.22	8.74	9.78
		13.24	8.47	9.43
		13.27	8.16	9.13
		13.29	7.9	8.79
		13.31	7.64	8.52
		13.33	7.33	8.21
		13.35	7.11	7.84
		13.37	6.9	7.58
		13.39	6.63	7.3
		13.42	6.45	7.07
		13.44	6.21	6.75
		13.46	5.98	6.55
		13.48	5.84	6.3
		13.5	5.63	6.14
		13.52	5.43	5.92
		13.55	5.29	5.69
		13.57	5.13	5.48
		13.59	4.97	5.29
		13.61	4.8	5.13
		13.63	4.62	4.96
		13.65	4.52	4.77
		13.68	4.42	4.65
		13.7	4.28	4.53
		13.72	4.17	4.41
		13.74	4.05	4.23
		13.76	3.93	4.1
		13.78	3.8	3.96
		13.81	3.74	3.83
		13.83	3.6	3.7
		13.85	3.57	3.57
		13.87	3.5	3.47
		13.89	3.36	3.4
		13.91	3.33	3.33
		13.93	3.3	3.27
		13.96	3.21	3.14
		13.98	3.13	3.07
		14	3.1	2.96
		14.02	3.05	2.93
		14.04	2.95	2.82
		14.06	2.88	2.77
		14.09	2.86	2.69
		14.11	2.79	2.64
		14.13	2.73	2.64
		14.15	2.71	2.51
		14.17	2.63	2.5
		14.19	2.58	2.4
		14.22	2.53	2.41
		14.24	2.46	2.28
		14.26	2.35	2.28
		14.28	2.4	2.15
		14.3	2.3	2.15
		14.32	2.32	2.07
		14.35	2.25	2.03
		14.37	2.23	1.93
		14.39	2.15	1.89
		14.41	2.12	1.86
		14.43	2.03	1.84
		14.45	2	1.76
		14.48	1.97	1.71
		14.5	1.95	1.73
		14.52	1.94	1.69
		14.54	1.95	1.66
		14.56	1.92	1.63
		14.58	1.84	1.65
		14.6	1.86	1.55
		14.63	1.78	1.57
		14.65	1.78	1.51
		14.67	1.74	1.41
		14.69	1.77	1.39
		14.71	1.69	1.34
		14.73	1.7	1.34
		14.76	1.7	1.29
		14.78	1.67	1.31
		14.8	1.64	1.22
		14.82	1.58	1.23
		14.84	1.53	1.22
		14.86	1.55	1.21
		14.89	1.62	1.19
		14.91	1.56	1.12
		14.93	1.58	1.16
		14.95	1.55	1.26
		14.97	1.47	1.11
		14.99	1.48	1.18
		15.02	1.46	1.16
		15.04	1.43	1.06
		15.06	1.42	1.04
		15.08	1.34	1.05
		15.1	1.36	1.06
		15.12	1.34	1.09
		15.14	1.39	1.04
		15.17	1.43	1.02
		15.19	1.4	0.97
		15.21	1.43	0.84
		15.23	1.35	0.84
		15.25	1.42	0.76
		15.27	1.29	0.82
		15.3	1.26	0.84
		15.32	1.26	0.85
		15.34	1.25	0.84
		15.36	1.26	0.81
		15.38	1.21	0.85
		15.4	1.23	0.73
		15.43	1.19	0.73
		15.45	1.19	0.67
		15.47	1.18	0.71
		15.49	1.15	0.65
		15.51	1.17	0.67
		15.53	1.21	0.65
		15.56	1.22	0.65
		15.58	1.15	0.67
		15.6	1.19	0.61
		15.62	1.18	0.64
		15.64	1.11	0.61
		15.66	1.14	0.59
		15.68	1.18	0.56
		15.71	1.16	0.61
		15.73	1.18	0.5
		15.75	1.17	0.6
		15.77	1.11	0.56
		15.79	1.13	0.64
		15.81	1.12	0.58
		15.84	1.08	0.55
		15.86	1.07	0.53
		15.88	1.11	0.52
		15.9	1.11	0.57
		15.92	1.04	0.52
		15.94	1.06	0.54
		15.97	1.12	0.52
		15.99	1.16	0.5
		16.01	1.15	0.48
		16.03	1.14	0.47
		16.05	1.13	0.47
		16.07	1.16	0.49
		16.1	1.2	0.48
		16.12	1.14	0.45
		16.14	1.11	0.5
		16.16	1.12	0.44
		16.18	1.12	0.44
		16.2	1.1	0.43
		16.23	1.11	0.42
		16.25	1.09	0.36
		16.27	1.05	0.36
		16.29	1.07	0.36
		16.31	1.01	0.33
		16.33	0.98	0.33
		16.35	0.94	0.28
		16.38	0.9	0.29
		16.4	0.94	0.31
		16.42	0.97	0.25
		16.44	0.82	0.2
		16.46	0.87	0.24
		16.48	0.83	0.21
		16.51	0.83	0.25
		16.53	0.85	0.18
		16.55	0.78	0.18
		16.57	0.79	0.14
		16.59	0.72	0.14
		16.61	0.74	0.12
		16.64	0.69	0.11
		16.66	0.71	0.11
		16.68	0.7	0.15
		16.7	0.62	0.09
		16.72	0.74	0.08
		16.74	0.71	0.1
		16.77	0.63	0.1
		16.79	0.63	0.12
		16.81	0.63	0.07
		16.83	0.59	0.07
		16.85	0.57	0
		16.87	0.53	0.02
		16.89	0.57	0.01
		16.92	0.58	0.07
		16.94	0.57	0.06
		16.96	0.52	0.11
		16.98	0.56	0.06
		17	0.54	0.08
		17.02	0.49	0.1
		17.05	0.46	0.1
		17.07	0.52	0.12
		17.09	0.59	0.11
		17.11	0.5	0.1
		17.13	0.48	0.11
		17.15	0.44	0.14
		17.18	0.51	0.2
		17.2	0.47	0.15
		17.22	0.47	0.16
		17.24	0.46	0.12
		17.26	0.48	0.17
		17.28	0.35	0.21
		17.31	0.41	0.22
		17.33	0.38	0.2
		17.35	0.4	0.25
		17.37	0.33	0.18
		17.39	0.36	0.2
		17.41	0.32	0.23
		17.43	0.27	0.24
		17.46	0.34	0.15
		17.48	0.31	0.19
		17.5	0.28	0.12
		17.52	0.27	0.13
		17.54	0.29	0.11
		17.56	0.29	0.06
		17.59	0.31	0.09
		17.61	0.33	0.08
		17.63	0.3	0.07
		17.65	0.3	-0.02
		17.67	0.3	0.04
		17.69	0.27	0.05
		17.72	0.3	0.02
		17.74	0.25	0
		17.76	0.22	0.01
		17.78	0.25	-0.03
		17.8	0.25	-0.02
		17.82	0.21	0.01
		17.85	0.25	-0.04
		17.87	0.24	-0.04
		17.89	0.28	-0.06
		17.91	0.23	0.03
		17.93	0.25	-0.01
		17.95	0.23	0.04
		17.98	0.24	0.03
		18	0.2	0.06
		18.02	0.27	0.01
		18.04	0.34	0.03
		18.06	0.32	0.03
		18.08	0.35	-0.02
		18.1	0.32	-0.03
		18.13	0.34	-0.05
		18.15	0.31	-0.06
		18.17	0.31	-0.1
		18.19	0.36	-0.01
		18.21	0.33	-0.07
		18.23	0.22	-0.05
		18.26	0.18	-0.13
		18.28	0.24	-0.12
		18.3	0.26	-0.15
		18.32	0.17	-0.15
		18.34	0.2	-0.12
		18.36	0.1	-0.15
		18.39	0.14	-0.12
		18.41	0.16	-0.17
		18.43	0.17	-0.14
		18.45	0.16	-0.2
		18.47	0.16	-0.15
		18.49	0.18	-0.16
		18.52	0.17	-0.15
		18.54	0.16	-0.12
		18.56	0.11	-0.09
		18.58	0.16	-0.1
		18.6	0.11	-0.1
		18.62	0.14	0
		18.64	0.18	0.07
		18.67	0.16	0.06
		18.69	0.19	0.11
		18.71	0.13	0.15
		18.73	0.14	0.17
		18.75	0.14	0.25
		18.77	0.18	0.3
		18.8	0.19	0.37
		18.82	0.19	0.4
		18.84	0.19	0.42
		18.86	0.2	0.47
		18.88	0.2	0.51
		18.9	0.22	0.56
		18.93	0.19	0.57
		18.95	0.27	0.68
		18.97	0.31	0.65
		18.99	0.33	0.72
		19.01	0.27	0.8
		19.03	0.32	0.83
		19.06	0.36	0.8
		19.08	0.37	0.84
		19.1	0.41	0.88
		19.12	0.38	0.87
		19.14	0.44	0.91
		19.16	0.41	0.9
		19.18	0.48	0.91
		19.21	0.5	0.99
		19.23	0.54	0.96
		19.25	0.5	0.87
		19.27	0.52	0.85
		19.29	0.57	0.85
		19.31	0.62	0.82
		19.34	0.66	0.78
		19.36	0.64	0.76
		19.38	0.62	0.69
		19.4	0.6	0.75
		19.42	0.69	0.72
		19.44	0.71	0.69
		19.47	0.7	0.7
		19.49	0.77	0.74
		19.51	0.81	0.65
		19.53	0.84	0.72
		19.55	0.84	0.74
		19.57	0.84	0.71
		19.6	0.81	0.72
		19.62	0.89	0.78
		19.64	0.89	0.75
		19.66	0.93	0.8
		19.68	0.95	0.86
		19.7	1.01	0.86
		19.72	1.04	0.91
		19.75	1.09	0.94
		19.77	1.15	1
		19.79	1.14	1.01
		19.81	1.27	1.03
		19.83	1.33	1.03
		19.85	1.41	1.17
		19.88	1.51	1.29
		19.9	1.58	1.35
		19.92	1.66	1.44
		19.94	1.78	1.53
		19.96	1.86	1.61
		19.98	2.11	1.77
		20.01	2.24	1.95
		20.03	2.5	2.06
		20.05	2.65	2.32
		20.07	3.01	2.64
		20.09	3.35	2.98
		20.11	3.76	3.3
		20.14	4.3	3.85
		20.16	4.86	4.52
		20.18	5.64	5.18
		20.2	6.53	6.04
		20.22	7.73	7.18
		20.24	8.98	8.48
		20.27	10.5	10.02
		20.29	12.26	11.79
		20.31	14.19	13.8
		20.33	16.3	16.05
		20.35	18.62	18.59
		20.37	21.04	21.34
		20.39	23.71	24.26
		20.42	26.38	27.41
		20.44	29.14	30.71
		20.46	31.98	33.97
		20.48	34.8	37.51
		20.5	37.5	40.74
		20.52	39.97	44.11
		20.55	42.33	47.18
		20.57	44.49	50.07
		20.59	46.37	52.8
		20.61	47.88	55.14
		20.63	49.11	57.12
		20.65	49.94	58.76
		20.68	50.39	60.01
		20.7	50.54	60.8
		20.72	50.29	61.16
		20.74	49.65	61.12
		20.76	48.79	60.65
		20.78	47.7	59.79
		20.81	46.32	58.58
		20.83	44.7	57.09
		20.85	42.96	55.29
		20.87	41.03	53.39
		20.89	39.04	51.19
		20.91	36.91	48.82
		20.93	34.85	46.36
		20.96	32.76	43.95
		20.98	30.69	41.49
		21	28.72	38.87
