# Supplementary material for: Regulation of inflammation and protection against invasive pneumococcal infection by the long pentraxin PTX3
Source: eLife. 2023 May 24;12:e78601. doi: 10.7554/eLife.78601 (PMC10266767; doi:10.7554/eLife.78601)
Supplement: Figure 8—source data 3. [file elife-78601-fig8-data3.xlsx]

## Sheet: Panel C
Figure 8C - PTX3 variants bindging on P-selectin coated plate
Immolized P-selectin (pmol/well)	A48			D48
12.5	2.224	2.231	2.208	1.895	2.032	2.039
6.25	1.931	1.956	1.899	1.673	1.655	1.836
3.125	1.738	1.657	1.626	1.512	1.62	1.742
1.5625	1.328	1.369	1.343	1.269	1.219	1.445
0.78125	0.967	0.941	0.95	0.856	0.906	1.072
0.390625	0.703	0.633	0.622	0.596	0.572	0.646
0.195312	0.331	0.32	0.291	0.286	0.327	0.364
0	0.109	0.11	0.116	0.114	0.123	0.124
