# Supplementary material for: Regulation of inflammation and protection against invasive pneumococcal infection by the long pentraxin PTX3
Source: eLife. 2023 May 24;12:e78601. doi: 10.7554/eLife.78601 (PMC10266767; doi:10.7554/eLife.78601)
Supplement: Figure 8—source data 4. [file elife-78601-fig8-data4.xlsx]

## Sheet: Panel D
Figure 8D - PTX3 variants bindging on C1q coated plate
Immolized C1q (pmol/well)	A48			D48
3.12	3.188	3.165	3.101	3.082	3.004	3.163
1.56	3.016	2.957	3.037	2.827	2.838	2.742
0.78	2.163	2.183	2.14	2.019	1.938	1.966
0.39	1.279	1.133	1.094	1.079	1.163	1.23
0.195	0.755	0.651	0.788	0.774	0.791	0.697
0.0975	0.723	0.591	0.488	0.564	0.586	0.576
0.04875	0.469	0.441	0.412	0.404	0.426	0.629
0	0.106	0.106	0.104	0.109	0.108	0.119
